1           **Time-course of population activity along the dorsoventral extent of**  
2           **the superior colliculus during delayed saccade tasks**

3

4           Authors: Corentin Massot<sup>1,3\*</sup>, Uday K. Jagadisan<sup>1,3</sup>, Neeraj J. Gandhi<sup>1-3\*</sup>

5

6   Authors affiliations: Departments of Bioengineering<sup>1</sup> and Neuroscience<sup>2</sup>, and Center for Neural Basis of  
7   Cognition<sup>3</sup>, University of Pittsburgh, USA

8

9   \*Corresponding authors:

10   Corentin Massot, University of Pittsburgh, Department of Bioengineering, Eye and Ear Institute, 203 Lothrop  
11   Street, room 153, Pittsburgh, PA, 15213, USA. Tel. +1 412 647 7869. Email: [corentinmassot@yahoo.fr](mailto:corentinmassot@yahoo.fr).

12   Neeraj Gandhi, University of Pittsburgh, Department of Bioengineering, 3700 O'Hara Street, Benedum 404,  
13   Pittsburgh, PA, 15261, USA. Tel. +1 412 648 4529. Email: [neg8@pitt.edu](mailto:neg8@pitt.edu).

14

15   Running Title: Sensorimotor transformation by the superior colliculus

16

17   Keywords: multi-contact linear probe, laminar organization, current-source density analysis, stochastic  
18   accumulator, local field potential, reference frame

19

## 20 **Abstract**

21           The superior colliculus (SC) is an excellent substrate to study functional organization of  
22 sensorimotor transformations. We used linear multi-contact array recordings to analyze the spatial and  
23 temporal properties of population activity along the SC dorsoventral axis during delayed saccade tasks.  
24 During the visual epoch, information appeared first in dorsal layers and systematically later in ventral layers.  
25 In the ensuing delay period, the laminar organization of low-spiking rate activity matched that of the visual  
26 epoch. During the pre-saccadic epoch, spiking activity emerged first in a more ventral layer, ~100ms before  
27 saccade onset. This buildup of activity appeared later on nearby neurons situated both dorsally and  
28 ventrally, culminating in a synchronous burst across the dorsoventral axis, ~28ms before saccade onset.  
29 Stimulation of individual contacts on the laminar probe produced saccades of similar vectors. Collectively,  
30 the results reveal a principled spatiotemporal organization of SC population activity underlying sensorimotor  
31 transformation for the control of gaze.

32

## 33 **Introduction**

34           Our interactions with the environment are mediated via brain networks that transform sensory  
35 signals to motor actions at the appropriate time. In the context of gaze control, this sensorimotor  
36 transformation entails processing of incoming visual information and generating a movement command to  
37 appropriately redirect the line of sight. The superior colliculus (SC) in the midbrain modulates its activity in  
38 response to both stimulus presentation and movement generation, as well as during the interval between  
39 the two events. Like cortex, the SC is composed of distinct layers. Its superficial layers are predominantly  
40 driven by visual processing structures like the retina and primary visual cortex, while its deeper layers  
41 communicate a broad spectrum of information with many cortical and noncortical areas <sup>1-3</sup>. It also has a  
42 canonical organization with established microcircuits for communication both within and across layers <sup>4</sup>.  
43 Finally, it has a topographic representation of visual space and for generation of gaze shifts to those  
44 locations <sup>5</sup>. Thus, the SC is ideally suited to study the neural correlates of sensorimotor transformation.

45           Despite a wealth of knowledge about the anatomical organization of the SC and the functional  
46 properties of individual SC neurons, current understanding about the link between structural and functional  
47 organization at the population level is limited. For instance, it is unclear whether the properties of individual  
48 neurons exhibit systematic spatiotemporal organization during the sensorimotor transformation, and how  
49 such organization is linked to the microarchitecture of the SC network. Bridging structure with function helps  
50 to not only understand the computations underlying the transformation but also to build biologically-inspired  
51 network models of sensorimotor learning and behavior <sup>6,7</sup>.

52           Linear microelectrodes have recently been used for such structure-function mapping, particularly  
53 in regions on the cortical surface, since they enable the simultaneous measurement of neural activity across  
54 multiple layers. Indeed, this approach has provided insights into how sensory <sup>8-11</sup> and cognitive processes  
55 like spatial attention <sup>12,13</sup>, working memory <sup>14</sup>, decision-making <sup>15</sup>, and episodic encoding <sup>16</sup> are mediated as  
56 a function of depth as well as about modes of communication between layers in driven and quiescent states

57 <sup>17,18</sup>. In our case, sensorimotor transformations occurring within a single brain region provide a unique  
58 opportunity to study the link between structural organization, functional physiology, and behavior. Thus, we  
59 extended the use of the laminar probe to the SC in the subcortex to investigate the visual to motor  
60 transformation as a function of depth. Our electrode penetrations were approximately orthogonal to SC  
61 surface and hence encountered neurons that responded vigorously for the same sensory and motor  
62 vectors. We were therefore able to test whether SC neurons exhibit fine-grained spatial and temporal  
63 organization that is particularly suited to implement the sensorimotor transformation

64 We recorded from the SC of two monkeys performing delayed saccade tasks with linear, multi-  
65 contact probes. We used current source density (CSD) analyses to obtain a veridical estimate of the relative  
66 probe depth in SC during any given penetration and align data from multiple sessions <sup>13,18</sup>. We found a  
67 strong and systematic depth-dependent organization for both intensity and timing of neural activity. Neurons  
68 across layers exhibited both visual and movement-related responses, but visual-preferring neurons were  
69 more likely to reside in dorsal layers, with a gradual, non-linear transformation to movement-preference  
70 occurring at deeper sites. The majority of SC neurons modulated their firing rates during both visual and  
71 movement epochs. The latency of the visual responses increased monotonically with depth. The activity  
72 during the delay period decreased to a low-spiking rate but was still higher for dorsal layers. In contrast,  
73 pre-saccadic buildup activity originated at intermediate depths and systematically spread bidirectionally in  
74 dorsal and ventral neurons. Buildup activity culminated in a punctate saccade-related burst that was  
75 synchronized across all neurons along the dorsoventral axis. These results reveal important spatiotemporal  
76 patterns of activity organization that advance our understanding of the neural network activity within SC.  
77 We present these results in the context of other studies of functional organization and discuss the potential  
78 implications of a structure-to-function mapping for sensorimotor transformations.

79

## 80 **Results**

81 Multiunit spiking activity (MUA) and local field potentials (LFPs) were recorded on each contact of  
82 a 16-channel laminar probe that spanned the dorsoventral extent of the SC in two Rhesus monkeys  
83 performing visually-guided (VG) and memory-guided (MG) delayed saccade tasks (Figure 1). A total of 26  
84 sessions were recorded from 16 different grid locations in the chamber. Of these, 20 were included for the  
85 analysis of the VG task. 3 sessions were excluded because of noisy LFP signals and 3, because of poor  
86 signal-to-noise ratio of spiking activity. 13 of the 26 sessions were also recorded with the MG task. 2 of  
87 these sessions were excluded because of poor signal-to-noise ratio. The intended angle of penetration was  
88 orthogonal to the SC surface so that all electrode contacts encountered neurons with similar preferred  
89 visual and/or motor vectors.

90

### 91 *Laminar organization of activity levels.*

92 Spike density functions aligned on visual burst and saccade onsets for an individual session of VG  
93 trials are shown in Figure 2a-b. Each trace is an average across trials for which the stimulus location

94 matched the optimal vector estimated for the penetration (see *Materials and Methods*). The waveform on  
95 each contact is scaled and shifted vertically for visualization. All channels increased activity in response to  
96 the visual target and in most cases showed two peaks. All movement bursts started before and peaked  
97 around saccade onset. Some movement bursts also displayed a second peak ~50ms after saccade onset,  
98 which was attributed to a post-saccadic visual response. These are well-known characteristics of SC neural  
99 activity<sup>19-21</sup>.

100 A previously under-appreciated feature that emerged from the laminar probe approach is the  
101 systematic pattern of activity levels dorsoventrally along the penetration. The average firing rate in the visual  
102 epoch increased gradually with depth, reached a maximum at a relatively dorsal site (contact 11 for this  
103 example, Figure 2c), and then decreased again for more ventral sites. The activity during the movement  
104 epoch followed the same trend except that it was shifted and peaked at a more ventral site (contact 5;  
105 contact 1 being the most ventral). We quantified the contrast between the visual and the movement related  
106 bursts by computing a visuo-movement index (VMI) (see *Materials and Methods*). The index was negative  
107 (dominated by the visual response) for the most dorsal channels and gradually became positive (dominated  
108 by the movement response) for increasingly more ventral channels, before plateauing for the most ventral  
109 channels (Figure 2d). Figure 2e-h reports the same results for MG trials from the same session. The trends  
110 in spike density waveforms across depths, the average firing rates in the visual and movement epochs, and  
111 the VMI are very similar to VG trials. One notable difference, as reported previously, is that the movement  
112 burst is attenuated in MG trials<sup>22</sup>, particularly for the more ventral channels. This is also reflected by a slight  
113 diminution of the VMI relative to VG trials for the ventral channels.

114 We next sought to average the similar trends we observed across sessions. To do so, we first  
115 needed a method to properly align the data to a reference contact or depth. One consideration is to use  
116 microdrive readings, which corresponds to the absolute depth of the linear probe from the dura. However,  
117 it is not a reliable measure because of two main limitations. First the daily setup of the recording equipment  
118 introduces slight configuration changes that are difficult to control for (notably the initial position of the  
119 probe). Second the viscosity of the cerebral tissue, which can change both within and across sessions,  
120 introduces an inherent variability. This makes it unlikely that the same absolute depth of the probe, as  
121 indicated by the micro-drive, corresponds to the same relative position within SC. While the effects of the  
122 recording setup can be mitigated<sup>23</sup>, the viscosity of the tissue cannot be controlled for. To overcome these  
123 limitations, we used an objective method based on features in the current-source density analysis (CSD)  
124 of the LFP signals from the visual epoch. Supplementary Figure 1 presents the CSD analysis and the  
125 different steps of the alignment procedure (see *Materials and Methods*).

126 The outcome of CSD-guided alignment and averaging across sessions for firing rates in the visual  
127 and movement epochs are shown in Figure 3. For VG trials (panel a), the amplitude of the visual activity  
128 plateaus from channel 2 to 6 peaks with a peak at channel 4 at 88.2spk/s (95%CI [56.1 130.3]spk/s), and  
129 gradually decreases for the other dorsal and ventral channels. The amplitude of the movement activity  
130 peaks at channel -2 at 136.7spk/s (95%CI [112.0 162.3]spk/s), and gradually decreases in both dorsal and

131 ventral directions. These general trends are similar for MG trials (panel b). The amplitude of the visual  
132 activity plateaus from channel 2 to 6 with a peak at channel 6 at 92.3spk/s (95%CI [57.8 139.2]spk/s) and  
133 gradually decreases for the other dorsal and ventral channels. The amplitude of the movement activity  
134 peaks at channel -1 at 113.7spk/s (95%CI [86.5 140.4]spk/s), and gradually decreases for the other dorsal  
135 and ventral channels. The most notable difference between VG and MG trials is the smaller, but not  
136 significantly different (Wilcoxon rank-sum test,  $P>0.067$ , for all channels), peak amplitude of movement  
137 activity for MG trials. Overall these results show that the amplitudes of two bursts are systematically  
138 organized across depths. The peak visual activity is situated between 0.75mm and 1.05mm (between  
139 channels 5 and 7) more dorsally than the peak movement activity, reflecting a visual preference for dorsal  
140 channels and movement preference for ventral channels.

141 We next evaluated whether the relative contributions of the visual and movement activity on each  
142 channel also follow a systematic organization along the dorsoventral axis of the SC. We thus measured the  
143 contrast between the visual and the movement amplitude activity by computing a visuo-movement index  
144 (VMI) (see *Materials and Methods*). The VMI analysis across all sessions reinforces the trends observed in  
145 the two distributions (Figure 3c). The contrast ratio was linear from dorsal channels down to the reference  
146 channel, but then plateaued for deeper channels. It is important to note that the plateau was not due to  
147 constant firing rates of visual and movement bursts. In fact, both visual and movement activities decreased  
148 ventrally from the reference channel, however their relative amplitudes remained constant, with the  
149 movement activity being higher. The VMI trends were similar for both VG and MG trials, as evidenced by  
150 the superposition of the confidence interval (CI) bands during the linear part. Ventrally to the reference  
151 channel, the plateau values are slightly different ( $\sim 0.5$ , VG trials;  $\sim 0.4$ , MG trials) but not statistically  
152 significantly (Wilcoxon rank sum test,  $P>0.033$ , for all channels). This is due to the lower firing rate of  
153 movement activity for MG trials <sup>22</sup>.

154 In addition to quantitative parameters like VMI, SC neurons are also parsed into visual, visuomotor  
155 (or visuo-movement), and motor (or movement) classifications. We too categorized each neuron's activity  
156 based on the significance of their visual and movement activity (see *Materials and Methods*). Of the whole  
157 population of recorded channels with significant MUA activity, visuo-movement neurons constituted the  
158 majority (Figure 4c). Figure 4a shows the distribution of neurons in each category as a function of depth for  
159 VG trials. The neuron count, plotted on the abscissa, is normalized to the number of sessions (left panel)  
160 and shows that more neurons were sampled in the ventral part of SC. The neuron count is also normalized  
161 individually for each channel to the number of significant MUA (right panel), in order to compensate for the  
162 difference in recorded MUA across channels. Visual-only MUA were mainly found at the most dorsal  
163 channels (channels 6, 7 and 8) and represented only a small proportion of the number of recorded units.  
164 This could be a consequence of difficulty isolating these smaller neurons <sup>1</sup>. Visuo-movement MUA were  
165 found across all depths and was the dominant category between channels 0 and 6. Movement-only MUA  
166 were mainly found on channels ventral to the reference channel and their proportion increased with depth.  
167 Figure 4b shows the categorization of MUA for MG trials. The distributions were qualitatively similar to VG

168 trials. These results collectively confirm the existing view, obtained from single electrode experiments, that  
169 the activity in SC is not randomly distributed across depths but instead follows a general principle: visual  
170 activity is predominant at dorsal depths and movement activity at ventral depths; in between, both visual  
171 and movement are mixed within the same MUA. Another crucial observation that emerges from this analysis  
172 is that SC neurons with the most vigorous movement-related burst reside in the visuo-movement, not  
173 movement, neuron category. This result has important consequence on how brainstem neurons that receive  
174 SC activity identify or decode the burst (visual or movement epoch) that triggers the movement (see  
175 *Discussion*).

176 We next evaluated the distribution of delay period activity as a function of depth for VG and MG  
177 trials (Figure 5). Each color represents the across-sessions average of the baseline-corrected delay activity  
178 observed in nonoverlapping 50ms time bins, starting from the last peak of the visual burst across channels  
179 (blue, 'Bin 1') to the end of the shortest delay period (orange, 'Bin 6'). The activity was, as expected, highest  
180 in the wake of the visual burst and then decreased gradually to a low-spiking rate as the delay period  
181 progresses. The strongest response stayed consistently between channel 2 and 4 throughout the delay  
182 period for both types of trials. For VG trials, the activity reached 33.0spk/s (95%CI [ 14.5 61.1]spk/s) on  
183 channel 2 on bin 6. For MG trials, the activity reached 43.6spk/s (95%CI [13.0 83.8]spk/s) on channel 3 on  
184 bin 5. Notably, these channels were the same that discharged maximally for the visual burst (thick black  
185 trace). For the deepest channels, we noticed a difference between the two tasks. For MG tasks, the activity  
186 was slightly higher than the peak activity of the visual burst while it remained at minimum level for VG tasks.  
187 Note that the confidence intervals were very large and overlapping across bins which makes this increase  
188 of activity not statistically significant in our data. Further investigation is needed to reveal the possible cause  
189 and role of this increase for MG tasks.

190  
191

### 192 *Laminar organization of temporal events.*

193 We next examined the time-course of activity during the visual and the pre-saccadic epochs in  
194 order to identify potential spatiotemporal patterns along the dorsoventral axis. We first focused on the  
195 latency of the sensory response (visual burst) across depths. Data recorded during the visual epoch are  
196 typically aligned on target onset. With this type of alignment, the visual response appears 50-100ms after  
197 target onset. However, individual neurons and local circuitry response are stochastic. A delay in this range  
198 along with the associated variability could be large enough to average out latency differences across  
199 channels. To circumvent this concern, we aligned data on the onset of the visual burst. Briefly, for each trial  
200 and for each channel, burst onset was estimated using the *Poisson surprise* detection method<sup>24</sup>. The  
201 channel with the most (not necessarily the earliest) detected bursts, henceforth referred to as the visual  
202 alignment channel (see *Materials and methods*), was used to align data on all channels. Figure 6a shows  
203 an example session (same one as Figure 2) with the spiking activity aligned on visual burst across; channel  
204 11 was the visual alignment channel. Each colored, vertical mark indicates the onset of the visual activity,

205 estimated using a 2-piecewise regression-based method (see Supplementary Figure 2 and *Materials and*  
206 *methods*). Figure 6b plots the visual latency estimate of each channel centered on the reference channel  
207 7, i.e., the channel obtained from the CSD analysis for aligning data in depths across sessions. Note that  
208 the reference and alignment channels need not be the same. A cubic polynomial fit of the visual latencies  
209 reveals a general spatiotemporal trend for this session from dorsal to ventral depths (dashed trace,  $R^2=0.83$ ,  
210  $p=0.001$ ). Figure 6c reports the session-averaged estimates of relative onset latencies in the visual epoch  
211 across depths. For VG trials, visual latencies were detected between  $-3.6\text{ms}$  (95%CI  $[-6.2 -1.3]\text{ms}$ ) on  
212 channel 5 and  $9.3\text{ms}$  (95%CI  $[2 18.8]\text{ms}$ ) on channel -8 relative to visual burst onset on the reference  
213 channel, and the trend of longer latencies from dorsal to ventral was well captured by the cubic fit ( $R^2 =0.66$ ,  
214  $P=0.004$ ). For MG trials, visual latencies were detected between  $-4.3\text{ms}$  (95%CI  $[-9.4 0.5]\text{ms}$ ) on channel  
215 5 and  $7.0\text{ms}$  (95%CI  $[1.0 12.0]\text{ms}$ ) on channel -7 relative to visual burst onset on the reference channel,  
216 and the trend of longer latencies from dorsal to ventral was also captured by the cubic fit ( $R^2 =0.65$ ,  
217  $P=0.004$ ). Linear regression analysis applied to these data gives similar trends albeit a less good fit for MG  
218 trials (VG:  $R^2 =0.6$ ,  $P=0.01$ ; MG:  $R^2 =0.36$ ,  $P=0.1$ ). As expected, both types of tasks show the same trend  
219 in visual burst onset from dorsal to ventral depths within SC, spanning  $7.3\text{ms}$  (between channel 5 and  
220 channel -8) and  $6.8\text{ms}$  (between channel -5 and channel -7) for VG and MG tasks, respectively. This is  
221 consistent with single-synaptic transmission from one channel to another in depth, although other  
222 mechanisms are also viable (see *Discussion*). A similar pattern in spike timing was recently reported across  
223 cortical layers in rodents <sup>25</sup>.

224 Next, we analyzed the pre-saccadic epoch that leads to movement onset. Previous work has shown  
225 that SC neurons display a buildup (or prelude) and/or burst of activity during that epoch <sup>26,27</sup>. In these  
226 previous studies, buildup and burst activity were detected by threshold crossing of the averaged firing rate  
227 activity computed over fixed temporal window defined for each event separately. This method was designed  
228 with the only objective to detect the presence of these events. Here, we wanted to not only detect them but  
229 also reliably estimate their onsets times and associated amplitudes.

230 We developed an algorithm that, first, estimates the onset latencies of well-defined events in the  
231 trial-averaged firing rate during the pre-saccadic epoch and, second, classifies them into interpretable  
232 spiking activity such as *buildup* and *burst* (see *Materials and Methods* and Supplementary Figure 3 for a  
233 visualization). We first defined three events that can be estimated from the spiking activity: (*E1*) the time of  
234 significant increase of the detrended activity compared to baseline; (*E2*) the hinge point before or at *E1*;  
235 (*E3*) the hinge point between *E2* and the time of peak activity (*P*) (see *Materials and Methods* and  
236 Supplementary Figure 3g for the definition of 'hinge point'). The detection of each event was accompanied  
237 by a measure of reliability obtained through a bootstrapping procedure. Events that did not meet a reliability  
238 criterion were discarded. As a consequence, anywhere between zero and three events were detected for  
239 the average spiking activity of each channel. It is important to note that events *E1*, *E2* and *E3* capture  
240 temporal characteristics of the activity and are interpretation-free in terms of neural circuit mechanism. A  
241 subsequent classification procedure enabled the interpretation.

242 Figure 7a-i shows the detection of events  $E1$ ,  $E2$ ,  $E3$  and  $P$  for the example dataset. The reliability  
243 of the detection of each event was measured by the CIs obtained through bootstrapping (see *Materials and*  
244 *Methods*). One can observe that for many channels CIs were well below the 0.6 threshold, indicating a  
245 reliable estimation of all events. Panels f and h also report the slopes and CIs around the hinge points for  
246 events  $E2$  and  $E3$ . The slopes were not significantly different for most of  $E2$  events, reflecting the slow  
247 accumulation of the activity. In contrast, they were significantly different for  $E3$ , reflecting a sharp increase  
248 of the activity. Figure 7i shows the final estimation of all four events, provided that they were statistically  
249 significant (see *Neuronal activity categorization, Materials and Methods*). Even though the search window  
250 for  $E2$  was large (within 100ms before  $E1$  and a total search window of 300ms),  $E2$  events were  
251 systematically detected within 50ms before  $E1$ , reflecting the onset of the accumulation that gives rise to  
252  $E1$ .

253 The next step was to classify these events into *buildup* or *burst* activity. When both  $E2$  and  $E3$  were  
254 detected and were significantly different from each other (i.e., their CIs did not overlap), they were labeled  
255 as *buildup* and *burst* events, respectively. If only  $E2$  was reliably estimated, the activity displayed an early  
256 *buildup* (<-50ms) but without a reliable hinge point for  $E3$  (e.g., channel 3 of Figure 7i). When only  $E3$  was  
257 reliably estimated, the activity only displayed a *burst* just before saccade onset (>-50ms) but without an  
258 initial *buildup* (e.g., channels 11 and 13 of Figure 7i). We plotted the distributions of events  $E2$  and  $E3$   
259 pooled across all channels and bootstrap iterations, although cases when both or only one of the two events  
260 were detected were considered separately (Figure 7k-m). It is important to note that the onset of each event  
261 is only constrained temporally by the size of their respective search windows, which means that either onset  
262 can occur at any time within 300ms before saccade onset with *buildup* preceding *burst* onset. The  
263 distributions of event times are binomial and exhibit visual separation around  $-50ms$  relative to saccade  
264 onset. We therefore used this boundary to distinguish *buildup* (<  $-50ms$ ) from *burst* (>  $-50ms$ ) events.  
265 Thus, many events detected as  $E2$  (*buildup*) were reclassified as  $E3$  (*burst*). Figure 7j replots the average  
266 spike density functions of all channels with identified buildup and burst events superimposed. For this  
267 session, peak activity (black tick marks) occurred around saccade onset for nearly all neurons along the  
268 dorsoventral dimension, *burst* activity (purple tick marks) was also present in most neurons (but fewer than  
269 those with peak activity), while *buildup* activity (cyan tick marks) was present primarily in neurons found  
270 along the ventral half of the track.

271 The analysis shown in Figure 7 was performed for each laminar recording session. We then  
272 averaged across the sessions after depth aligning the data relative to the reference channel defined by the  
273 CSD method, as discussed earlier (see Supplementary Figure 1). Figure 8 provides a detailed description  
274 of the evolution of onset latencies and amplitudes of each event across depths. All results are reported  
275 between channels -8 and 8 and 0 was the reference channel. Results are reported separately for VG (Figure  
276 8a-d) and MG (Figure 8e-h) trials.

277 Figure 8a show the results of the estimation of the events  $E1$ ,  $E2$ ,  $E3$ , and  $P$ . We found that  
278 significant peaks of activity were detected across the whole track (from channel -8 to 7, Figure 8 a,b (black



279 trace)). Event *P* (black trace), which denotes the peak activity, was detected between -0.5ms (95%CI [-4.1  
280 3.5]ms) on channel 7 and 5.9ms (95%CI [3.3 8.4]ms) on channel -2 relative to saccade onset. Event *E1*  
281 (green trace), which corresponds to a significant change from baseline of the detrended activity during the  
282 200ms preceding saccade onset, was detected between -76.0ms (95%CI [-101.0 -54.2]ms) and -33.8ms  
283 (95%CI [-44.6 -24.2]ms) relative to saccade onset. Event *E2* (blue trace), which detects the hinge point  
284 associated with the onset of the non-detrended activity accumulation in a 100ms window preceding *E1*,  
285 varied between -100.2ms (95%CI [-115.0 -84.6]ms) and -59.0ms (95%CI [-81.7 -35.8]ms) before saccade  
286 onset. Figure 8a highlights the tight relationship between *E1* and *E2*, with a maximum average difference  
287 of ~25ms and confidence intervals of the same order for both events, even though *E2* was searched for in  
288 a 100ms window preceding *E1*. We interpret this consistency to suggest that the 'hinge point' *E2* is a  
289 meaningful event. Event *E3* (red trace), identified as the 'hinge point' between *E2* and *P*, was detected  
290 between -29.2ms (95%CI [-38.0 -23.1]ms) and -21.4ms (95%CI [-22.2 -20.5]ms) before saccade onset.

291 Figure 8b plots the amplitude of spiking activity at the time of event *P*, *E1*, *E2* and *E3* across depths.  
292 The activity at the onset of *E1* was limited to low firing rate, between 5.0spk/s(95%CI [2.2 9.4]spk/s) on  
293 channel -8 and 16.2spk/s(95%CI [4.0 37.1]spk/s) on channel 6. As expected, the average activity at the  
294 onset of *E2* was even closer to baseline than *E1*, and varied between -0.48spk/s (95%CI [-3.4 2.6]spk/s)  
295 and 7.8spk/s (95%CI [-3.2 25.5]spk/s). The activity at the onset of *E3* was variable across depths with a  
296 maximum amplitude of 54.4spk/s (95%CI [40.3 72.0]spk/s) on channel -4 and the minimum amplitude for  
297 the most dorsal and ventral channels. Finally, the activity at event *P* was similar to *E3* but with larger  
298 amplitude. Activity at *P* reached a maximum amplitude of 163.3spk/s (95%CI [134.6 192.7]spk/s) on  
299 channel -2 and a minimum amplitude for the most dorsal and ventral channels. Overall the results presented  
300 in Figure 8a,b indicate that events *E1*, *E2* and *E3* can be estimated reliably in the average waveform on  
301 each channel and that they correspond to systematic events of the pre-saccadic activity.

302 Once the events (*E2*, *E3*) were detected, we classified them into *buildup* and *burst* categories.  
303 Figure 8c (cyan traces) shows the organization of the onset of *buildup* events across depths. Onset of  
304 *buildup* was the earliest on channel 2 with an average latency of -102.7ms (95%CI [-120.2 -83.1]ms) relative  
305 to saccade onset. It occurred gradually later for increasingly more distant channels in both dorsal and  
306 ventral directions, reaching a minimum of -71.1ms (95%CI [-97.2 -55.2]ms) relative to saccade onset. These  
307 onsets estimates are similar albeit slightly later than estimations obtained by the previous study which  
308 analyzed the onset of *buildup* 100ms before saccade onset<sup>26</sup>. The difference in technique to extract onset  
309 of *buildup* may explain this discrepancy. Also, our capacity to record across depths with a laminar probe  
310 allowed a finer sampling of the neural activity than this previous study that focused mainly on large neural  
311 activity. Interestingly, the onsets of *buildup* activities displayed a systematic shift across depths and was  
312 well captured by a cubic fit (dashed cyan line,  $R^2=0.67$ ,  $P=0.003$ ) reaching a minimum on channel -1. While  
313 this analysis cannot reveal a causal relationship between the activity of neurons on different channels, the  
314 gradual change of the onset latency of *buildup* may be the result of an activity that initiated in neurons  
315 situated around channel -1 and progressively later in dorsal and ventral neurons. This spatiotemporal

316 pattern across depths may reflect a network process that leads to the generation of the movement-related  
317 burst (see *Discussion*). Figure 8d (cyan trace) shows that the firing rate at the onset of the *buildup* activity  
318 was on average 3.4spk/s (95%CI [-0.3 8.3]spk/s) without any significant trend across channels (cubic fit,  
319  $R^2=0.31$ ,  $P=0.21$ ) indicating that the detection of the onset of *buildup* corresponded to a true onset of activity  
320 relative to baseline.

321 The purple trace in Figure 8c shows the organization of *burst* onset across depths. *Bursts* were  
322 found at all recorded depths, from channel -8 to channel 7. All *bursts* appeared on average -26.9ms (95%CI  
323 [-32.0 -22.3]ms) relative to saccade onset which is similar to a previous result (Figure 18 in <sup>26</sup>). All *bursts*  
324 were temporally tightly aligned (i.e. synchronous, without any significant trend across depths) (cubic fit,  
325  $R^2=0.4$ ,  $P=0.11$ ), regardless of whether the *burst* was preceded by a *buildup*. This result is indicative of a  
326 general recruitment into a 'burst' mode of all neurons along the dorsoventral axis. Figure 8d (purple traces)  
327 shows that the firing rate at the onset of the *burst* activity reached a maximum of 50.2spk/s (95%CI [39.9  
328 61.4]spk/s) on channel -2 and decreased for dorsal and ventral channels. This shift was well captured by a  
329 cubic fit (dashed purple line,  $R^2=0.60$ ,  $P=0.01$ ). Hence, *burst* amplitude displayed a systematic shift across  
330 depths: neurons situated on channel just dorsal to the reference channel displayed the maximum firing rate,  
331 while neurons at the most dorsal and ventral positions displayed a reduced firing rate. This result implies  
332 that the *burst* activity, which is related to the signal that is sent to downstream structures to control the eye  
333 movement generation, is not simply duplicated across depths but, on the contrary, its amplitude is a function  
334 of the laminar position from where it originates (see *Discussion*).

335 We repeated the same analyses for MG trials (Figure 8e-h). Figure 8e show the results of the  
336 estimation of the events *E1*, *E2*, *E3*, and *P*. We found that significant peaks of activity were detected across  
337 the whole track (from channel -8 to 7, Figure 8e,f (black trace)). Event *P* (black trace) was detected on  
338 average 1.3ms (95%CI [-2.0 4.8]ms) after saccade onset without any significant trend across channels  
339 (cubic fit,  $R^2 =0.33$ ,  $P=0.2 >0.05$ ). Event *E1* (green trace) was detected between -65.1ms (95%CI [-88.1 -  
340 44.5]ms) and -30.2ms (95%CI [-52.4 -15.1]ms) relative to saccade onset. Event *E2* (blue trace) varied  
341 between -93.6ms (95%CI [-110.9 -76.3]ms) and -43.9ms (95%CI [-51.4 -36.5]ms) relative to saccade onset.  
342 Once again, Figure 8e highlights the tight relationship between *E1* and *E2*, with a maximum difference of  
343 ~30ms and confidence intervals of the same order for both events. Event *E3* (red trace) was detected on  
344 average -28.4ms (95%CI [-36.4 -22.1] ms) relative to saccade onset between channel -6 and 6, without  
345 any significant trend across depths (cubic fit,  $R^2=0.10$ ,  $P=0.80$ ).

346 Figure 8f plots the amplitude of spiking activity at the time of event *P*, *E1*, *E2* and *E3* across depths.  
347 The activity at the onset of *E1* was limited to low firing rate between 3.6spk/s(95%CI [-4.7 10.7]spk/s) and  
348 27.2spk/s (95%CI [15.6 37.7]spk/s). As expected, the average activity at the onset of *E2* was very close to  
349 baseline, between -1.1spk/s (95%CI [-10.6 9.2]spk/s) and 11.3spk/s (95%CI [4.4 18.0]spk/s). The activity  
350 at the onset of *E3* was variable across depths with a maximum amplitude of 63.8spk/s (95%CI [43.7  
351 82.8]spk/s) on channel -2. The minimum amplitude for the most dorsal channel 26.9spk/s (95%CI [17.6  
352 37.4]spk/s) on channel 4. Finally, the activity at event *P* reached a maximum amplitude of 132.8spk/s

353 (95%CI [97.1 167.9]spk/s) on channel -1, which is ~30spk/s lower than the maximum amplitude for VG  
354 trials and a minimum activity for the most dorsal and ventral channels. Similar to VG trials, the results  
355 presented in Figure 8e,f indicate that events *E1*, *E2* and *E3* can be estimated reliably in the average  
356 waveform.

357 The classification of events using classification labels (*buildup*, *burst*) are presented in Figure 8g,h  
358 (cyan traces for *buildup* and purple traces for *burst*). Onset of *buildup* was the earliest on channel -3 with  
359 an average latency of -95.1ms (95%CI [-119.0 -75.5]ms) relative to saccade onset. It occurred gradually  
360 later for increasing more distant channels in both dorsal and ventral directions, reaching a minimum of -  
361 66.7ms (95%CI [-75.0 -59.9]ms) relative to saccade onset. Similar to VG trials, the onsets of *buildup*  
362 activities displayed a systematic shift across depths which was well captured by a cubic fit (dashed cyan  
363 line,  $R^2=0.62$ ,  $P=0.02$ ). Figure 8h (cyan trace) shows that the firing rate at the onset of the *buildup* activity  
364 was on average 8.4spk/s (95%CI [1.5 16.0]spk/s) and was not significantly different across channels (cubic  
365 fit,  $R^2=0.37$ ,  $P=0.14$ ). Similar to VG trials, this indicates that the detection of the onset of *buildup* correspond  
366 to a true onset of activity relative to baseline.

367 The purple trace in Figure 8h shows the organization of *burst* onset across depths. *Bursts* were  
368 detected on nearly every neuron encountered in the penetration, from channel -6 to channel 6. Similar to  
369 VG trials, all *bursts* appeared on average -29.1ms (95%CI [-36.2 -22.7]ms) relative to saccade onset and  
370 all *bursts* along the dorsoventral axis were temporally tightly aligned (i.e. synchronous) (cubic fit,  $R^2=0.35$ ,  
371  $P=0.26$ ). Figure 8h (purple traces) shows that the firing rate at the onset of the *burst* activity reached a  
372 maximum of 55.7spk/s (95%CI [31.4 78.2]spk/s) on channel -2 and decreased for dorsal and ventral  
373 channels. This shift was well captured by a cubic fit (dashed purple line,  $R^2=0.70$ ,  $P=0.017$ ). Hence, similar  
374 to VG trials, *bursts* amplitude displayed a systematic shift across depths.

375 Next, we analyzed the correspondence between the activity at *burst* onset and at the peak  
376 response. To do so, we used the cubic fit computed on the distribution of the average firing rate at the onset  
377 of the *burst* and at the peak *P*. A scaling factor was computed between the maximum firing rates of the two  
378 fits. Figure 8d shows the rescaled fit of the *bursts* (green dashed line) for VG trials and shows the close  
379 correspondence with the fit of the *peak* across all depths. Hence, the *peak* activity of the movement epoch  
380 appears to be a scaled version of the activity at the *burst* onset across depths. Figure 8h shows the same  
381 information for MG trials, and shows that the correspondence with the fit of the *peak* is close for ventral  
382 channels but noisier for dorsal channels. For VG and MG trials the scaling factor was 3.3 and 2.4,  
383 respectively. Note that the amplitude at the onset of *burst* activity for VG and MG trials were not significantly  
384 different (Wilcoxon rank sum test,  $P>0.14$ ). This result reveals that the lower scaling factor between *burst*  
385 and the peak activity of MG trials is not the result of higher amplitude of *burst* onset activity. Rather, this  
386 indicates a reduced peak activity for MG trials relative to VG trials while burst activity reached a similar  
387 amplitude (see *Discussion*).

388 Finally, we looked at the classification of the spiking activity based on the type of events displayed  
389 during the pre-saccadic epoch. Similar to the work of Munoz and Wurtz<sup>26</sup>, we used three labels based on

390 spiking activity: *buildup*-only, *burst*-only and *buildup-burst*. Note that even if their exact definitions are  
391 different, *buildup* and *burst* activity by the ‘threshold method’ of <sup>26</sup> and *buildup* and *burst* events by our  
392 technique relate to similar features of the spiking activity and their detection can be used to compare the  
393 categorization of SC activity. For VG trials we found that each type of activity represents 17%, 30% and  
394 53% (27%, 29% and 44%, respectively, for MG trials) of the whole population of recorded activity,  
395 respectively (Figure 9). Munoz and Wurtz found that *burst-only* neurons was the largest proportion (Table  
396 1, 6%, 68% and 26%, respectively, from <sup>26</sup>). Our results for both VG and MG trials show that *buildup-burst*  
397 activity was the largest type. The reason for this discrepancy is two-fold. First, Munoz and Wurtz used a  
398 conservative method based on threshold-crossing on the average activity measured in a window starting  
399 100ms before saccade onset. However, the latency distribution of *buildup* onset (Figure 8c) shows that  
400 many channels display a *buildup* activity later than 100ms before saccade onset. Hence, their method would  
401 not be able to detect these ‘late’ *buildup* onsets. Second, our method is more sensitivity at detecting reliable  
402 small *buildup* activity as it is based on the detection of a hinge point of the activity, which is particularly  
403 critical for the most dorsal and ventral channels where the average activity is lower. Hence, their method  
404 likely yielded a very conservative estimate of the proportion of *buildup* activity. Our laminar data allow us  
405 also to plot the distribution of each type of activity across depths (Figure 9). For VG trials, *buildup-burst*  
406 neurons were found in the more central positions between channels -6 and 4 and less at dorsal positions,  
407 *burst-only* neurons are found at all depths but particularly at more dorsal positions above channel 4, and  
408 *buildup-only* neurons are found at more ventral positions below channel -7. Similar distribution, albeit  
409 noisier, were found for MG trials. These results confirm the subdivision of SC intermediate layers into a  
410 dorsal subdivision that mainly contains *burst-only* neurons and a ventral subdivision that mainly contains  
411 *buildup-burst* neurons <sup>26</sup>. The boundary of this subdivision would be situated around channel 3.

412

#### 413 *Stimulation-evoked saccades along the dorsoventral axis of SC*

414 Although the focus of this study was to examine SC activity patterns across depth, we did  
415 occasionally deliver electrical stimulation through each contact at the end of experimental sessions. To  
416 preserve the integrity of the electrode, however, each contact was stimulated only a few times (typically just  
417 twice) and the same stimulation parameters (40 $\mu$ A, 400Hz, 200ms; biphasic, 200 $\mu$ s pulse duration, 17 $\mu$ s  
418 inter-pulse duration) were used across contacts and sessions. Sufficient data were available for 12 sessions  
419 to permit a preliminary evaluation. Figure 10 plots stimulation-evoked saccade vectors as a function of  
420 depth for 5 example sessions. It also provides a histogram of the standard deviations in amplitude and  
421 direction across contacts for each session. All but one session had lower than 15° of standard deviation in  
422 directions and all sessions had less than 5° of standard deviation in amplitude. Hence, there was a high  
423 degree of similarity between saccade vectors across channels. Note that although the electrode was  
424 inserted roughly orthogonally to the surface of SC, these measurements are not sufficient to ensure that it  
425 traversed in an actual anatomical “column” within the SC.

426

## 427 Discussion

428 We used a multi-contact laminar probe to record simultaneously the activity of a population of  
429 neurons along the dorsoventral axis of the SC of nonhuman primates performing delayed saccade tasks.  
430 The categorization of the activity of each channel revealed, as summarized in Figure 11, a visual preference  
431 for the most dorsal channels, a movement preference for the most ventral channels, and combined visual  
432 and movement responses for intermediate channels. The firing rates associated with the two events were  
433 not randomly distributed but rather changed systematically along the dorsoventral dimension (gray shades),  
434 each peaking at a certain depth and exhibiting weaker bursts with distance. Maximal activity during the  
435 visual epoch was observed ~1mm more dorsally than during the saccade-related burst, but both were within  
436 the intermediate layers. The visuomotor index indicated a clear non-linear relationship along the  
437 dorsoventral axis from visual to motor preference. Low-frequency activity observed during the delay period  
438 was also not uniform. It followed the same spatial organization as the activity during the visual epoch: the  
439 most vigorous visual burst and the strongest delay-period activity were observed at the same depth. The  
440 onset latencies of visually-evoked activity revealed a continuous trend from dorsal to ventral channels  
441 (purple arrows). The onset latencies of both *buildup* and *burst* activities were detected reliably and revealed  
442 systematic spatiotemporal patterns during the pre-saccadic epoch: *buildup* activity was initiated in the  
443 central part of the intermediate channels and gradually later in adjacent dorsal and ventral channels (blue  
444 arrows), while *burst* activity appeared synchronously across almost all channels (red arrows). These results  
445 reveal that SC is functionally organized across depths, and its spatiotemporal patterns reflect network  
446 processes properties that were difficult to appreciate in previous studies that relied on single unit recordings.  
447 These structural patterns of SC network architecture can inform the design of biologically-inspired models  
448 that implement sensorimotor transformation<sup>6,7</sup>.

449 Past efforts to correlate activity features to neuron location in SC were limited by the uncertainties  
450 of estimating the single electrode's depth. Even the most methodical approach e.g.,<sup>23</sup> cannot account for  
451 settling of neural tissue or of anisotropies in SC geometry (e.g., curvature). The constant intercontact  
452 distance of the laminar probe combined with current-source density alignment circumvent many limitations  
453 and thereby allow a more rigorous examination of the effects of depth. Consider, for example, the  
454 visuomotor index (VMI), a conventional ratio that contrasts the relative contributions of the visually-triggered  
455 and movement-related activities of a neuron. The relationship between VMI and depth for single electrode  
456 data (see Figure 3B of Ikeda et al. (2015)) shows a linear trend of increasing motor dominance with depth,  
457 but it isn't able to reveal the saturation of VMI at deeper locations that we report here (Figure 3C). This  
458 saturation is observed at deeper sites, where the peak activities in the visual and movement epochs begin  
459 to decrease in relatively equal amounts. These sites are ventral to the high-frequency, saccade-related  
460 burst neurons classically associated with the SC and, we speculate, that sampling bias probably contributed  
461 to their omission.

462

463 *Insights into sensorimotor transformation.*

464 Recognizing that connectivity along the dorsoventral extent of SC is ideally suited to transform  
465 sensory signals into movement commands, previous studies have attempted to delineate the functional and  
466 anatomical substrates of the transformation. Visual latency, for example, is known to increase only modestly  
467 with depth<sup>28</sup>, on the order of 10-20ms and replicated by our observation (Figure 6C). One logical prediction  
468 is that the superficial layers anatomically innervate the intermediate and deep layers of SC and that visual  
469 information is relayed through it. Indeed, *in vitro* slice studies in rodents have established this circuit<sup>4</sup>.  
470 However, this pathway is generally considered in the context of converting sensory signal into a movement  
471 command and as the primary pathway that governs short-latency express saccades<sup>29</sup>. While we don't  
472 dispute this hypothesis, we also can't refute the possibility that this pathway's central role may be to relay  
473 the visual signal to visuomotor neurons. It may even be relayed to putative motor neurons in the SC but  
474 other inhibitory inputs may suppress its expression, and the removal of inhibition could unmask the sensory  
475 burst<sup>30</sup>. It is also possible that extracollicular sources may contribute to or augment the visual response  
476 relayed from the superficial layers. Indeed, visual responses of visuomotor neurons in intermediate/deep  
477 SC are delayed or absent after visual cortex lesion, while the sensory response of visual neurons in  
478 superficial layers are not as compromised<sup>31,32</sup>. Visual information can even be processed through the frontal  
479 eye fields, whose projections terminate in the intermediate layers of SC<sup>33,34</sup>. Future experiments that  
480 combine laminar probe recordings with experimental manipulations of extracollicular inputs could provide  
481 useful insights into layer-specific functional contributions.

482 The transient burst of the visual response was followed by low-level activity in a subset of SC  
483 neurons (Figure 5). Given the rich balance of excitation and inhibition across all layers of the SC<sup>35</sup>, the  
484 persistent activity can be readily generated through network dynamics e.g.,<sup>36</sup>, although intrinsic, biophysical  
485 features likely contribute as well<sup>37,38</sup>. That this low frequency activity is more prevalent in dorsal layers can  
486 be inferred from data compiled with single electrode experiments see Figure 7C,D of<sup>39</sup>, although its  
487 alignment, with rank order preserved, is best appreciated from the laminar probe data (compare Figure  
488 3a,b with Figure 5). Notably, there was no transition from visually-dominant to motor-dominant layers during  
489 the delay period, which we believe has major implications on reference-frame transformation research.  
490 Previous studies have suggested that the transformation between reference frames occurs during the delay  
491 period (under appropriate task design). Correlative evidence exists for craniocentric to oculocentric  
492 representation<sup>40,41</sup> and for visual, target-centered to motor, gaze-centered coordinates<sup>42-44</sup>. One way to  
493 reconcile these seemingly discrepant results, particularly with respect to the latter set of studies, is that the  
494 transformation may occur in dorsal, visually-dominant layers and that the population activity doesn't  
495 transition to the motoric layers until after the animal receives permission to produce a movement. This  
496 notion suggests that the gaze-centered signal, although thought to be a movement signal, is in fact not  
497 interpreted as a movement command perhaps because the population activity exhibits state space  
498 dynamics that are not optimal for evoking a movement<sup>45-47</sup>.

499           Once the animal receives permission to initiate a saccade, the population activity transitions to  
500 more ventral layers (Figures 8 and 11), where neurons begin to accumulate activity ~100ms before saccade  
501 onset. Slice experiments suggest that *buildup* activity is mediated by both a reduction of GABAergic  
502 inhibition<sup>29</sup> and amplification by NMDA-mediated synaptic transmission in local excitatory circuitry within  
503 the intermediate layer neurons<sup>48-51</sup>. This local excitatory circuit, perhaps along with the excitatory ascending  
504 pathway<sup>52,53</sup>, induces *buildup* activity in neighboring neurons in adjacent layers at gradually longer latencies  
505 (blue arrows, Figure 11). The continued amplification of buildup activity culminates in a synchronized burst  
506 across nearly all layers of the SC (red arrows, Figure 11), where the peak firing rate of the movement burst  
507 appears to be a linear amplification of the cell's activity at *burst* onset<sup>49</sup>. Accordingly, across the active  
508 population, the neurons with the earliest *buildup* onset accumulate activity the longest and therefore have  
509 the highest firing rate at both *burst* onset and at peak. Given their saccade related discharge profiles, these  
510 are the putative neurons that project to the brainstem burst generator<sup>54,55</sup> and likely mediate instantaneous  
511 control of saccade velocity<sup>56,57</sup>. Further, the constant scaling factor between activity at burst onset to peak  
512 burst across channels (Figure 8) provides functional evidence of linear amplification in the motor burst<sup>49</sup>.  
513 The amplification factor was different for VG and MG trials (~3 vs. ~2) while the activity at *burst* onset was  
514 similar. Whether SC can realize this computation intrinsically remains an open question and will be the  
515 object of future research.

516           Finally, as suggested in Figure 11, each laminar position within SC contains projection neurons to  
517 different structures. The laminar organization of the movement burst amplitude implies that these projection  
518 structures may decode the output of SC information in a specific way, maybe reflecting different constraints  
519 related to their role in the control of the eye movement generation. For example, the signal sent to PPRF  
520 may need to be temporally precise while a corollary discharge of the saccade command to pulvinar or  
521 relayed to FEF, may not require such precision. Further computational modelling and multi-area recording  
522 are required to evaluate the relation between the laminar organization of the SC activity and the input  
523 signals to its projection structures.

524

#### 525 *Nomenclature of SC neurons.*

526           The long history of SC studies of sensorimotor transformation, specifically visual input leading to  
527 saccadic eye movement, have yielded a variety of names to describe the types of neurons involved in the  
528 process. The most generic, hypothesis-free nomenclature is to classify them as visual, motor and  
529 visuomotor neurons based on activity modulation during the visual and/or movement intervals. Visual  
530 neurons are found in the superficial layers, and visuomotor and motor neurons reside in the deeper layers  
531<sup>58,59</sup>, but it has been debated whether the latter two are segregated along the dorsoventral axis. The ability  
532 of a laminar probe to record simultaneously the activities of neurons along this axis revealed that there is a  
533 gradual transition from visual to visuomotor to motor neurons with depth but the vast majority are visuomotor  
534 (Figure 4). We also demonstrated previously<sup>30</sup> and discussed above that putative motor neurons can

535 exhibit a visual response under certain conditions. Thus, we prefer to avoid making a distinction between  
536 visuomotor and motor neurons.

537 Hypothesis-guided names have also been assigned to SC neurons, with different nomenclatures  
538 being introduced over time. Saccade-related burst neurons discharge a high-frequency burst for optimal  
539 vector saccades, and burst onset is tightly coupled to saccade onset, leading the movement by ~20ms<sup>58</sup>.  
540 Neurons with low-frequency activity several hundred milliseconds before the burst were once called long-  
541 lead movement neurons<sup>59,60</sup>. They may be the same subclass of neurons that were later termed quasi-  
542 visual neurons<sup>20</sup> and prelude neurons<sup>27</sup>. Other families of names (clipped, partially clipped, and unclipped  
543 neurons or open- and closed-movement field neurons) emerged from experiments that tested whether SC  
544 activity controls dynamic motor error<sup>26,61</sup>. The current nomenclature labels intermediate/deep layer neurons  
545 as fixation, *burst*, and *buildup* neurons<sup>26,62</sup>. Fixation neurons reside in the rostral pole of the SC. They  
546 discharge at a tonic rate during fixation, pause during large saccades, and burst during very-small amplitude  
547 saccades, including microsaccades<sup>62,63</sup>. *Buildup* neurons exhibit low-level activity well before saccade  
548 onset and therefore are similar to prelude or long-lead movement neurons. *Burst* neurons are closest to the  
549 saccade-related burst neurons. Finally, the reader should keep in mind that despite the use of categories,  
550 most neurons exhibit both *burst* and *buildup* features (Figure 9).

551 More recent SC studies have used a stochastic accumulator framework to correlate features of  
552 neural activity with saccade reaction time e.g.,<sup>64,65,66</sup>. Fitting the pre-saccadic activity with a two-piecewise  
553 linear regression yielded a time of inflection point that is correlated with reaction time<sup>65</sup>. Moreover, their  
554 data suggest that the accumulation occurs ~65ms before saccade onset (accumulation and saccade onsets  
555 were respectively  $142 \pm 16$ ms and  $207 \pm 20$ ms, relative to fixation offset). We sought to relate this finding to  
556 the *buildup* or *burst* features of neural activity, and an initial glance suggests that accumulation onset is a  
557 feature of *buildup* neurons. However, our analysis suggests that *buildup* onset occurs at least 30ms earlier,  
558 ~100ms before saccade onset (Figure 8). We believe this discrepancy may be a result of the differences in  
559 detection approaches. We developed a method to reliably detect and classify a *buildup* (accumulation)  
560 and/or a *burst* (threshold) process. By contrast, the previous study, by using a two-piece linear regression,  
561 limited the detection to only one neural event that spanned from 100 ms before fixation offset to the time of  
562 peak in the saccade-related burst<sup>65</sup>. Their method was applied on individual trials and the amount of  
563 stochastic noise in the spiking discharge may have prevented the distinction between two neural events.  
564 Here we used trial-averaged waveform combined with bootstrapping of the trial sets, which allowed the  
565 detection of at most two distinct neural events within a probabilistic framework. To the best of our  
566 knowledge, this is the first time a method is developed to detect precisely and reliably the onset of *buildup*  
567 and *burst* activity, beyond the use of predetermined temporal windows of analysis. This method revealed  
568 that *buildup* activity was detected gradually on different channels spanning ~30ms since the initial *buildup*  
569 around the center of the intermediate layers.



570 *Burst* onset occurred synchronously across all layers, ~28ms before saccade onset. This is  
571 comparable with the values used or estimated in previous oculomotor studies<sup>65,67,68</sup>. It is also in line with  
572 the spike modulation times observed in burst generator neurons that participate in saccade generation<sup>69,70</sup>.  
573 It is generally stated the impact of reaching a threshold (equivalently, entering burst mode), either at  
574 individual or population activity, is to inhibit the brainstem omnipause neurons<sup>67,71,72</sup>, although other  
575 frameworks that depend on state space dynamical systems may facilitate direct communication between  
576 SC and pontine burst neurons<sup>45-47</sup>.

577

578 *Alignment of recorded sessions based on CSD analysis.*

579 We presented a method to align SC laminar data across sessions based on the analysis of a sink  
580 pattern during the visual epoch. The results show that the alignment is precise enough to unveil a systematic  
581 functional organization of the intermediate layers of SC. Here, we interpret the strong sink pattern occurring  
582 during the visual epoch as the input current reflecting the visual input from target presentation. Based on  
583 known SC neuroanatomy<sup>1</sup>, this input is most likely occurring in the optic and superficial layers. Previous  
584 works in the primary and the frontal cortex<sup>8,12,13,17,18</sup> have also used CSD analysis to align data across  
585 sessions. Most of these methods use a sink/source pair pattern occurring early on during the trial and  
586 interpreted as the sensory input occurring in layer 4. One study, in addition, uses a distinctive pattern of the  
587 LFP to measure the depth of the dura while recording in SEF<sup>18</sup>. In the absence of such anatomical marker,  
588 methods based only on a systematic pattern in the CSD, like our SC method or like the cortical methods,  
589 can only align data relatively to an arbitrary reference. Histological verification and/or neuroanatomical  
590 experiments are required to verify the reference location. We did not pursue this option as the animals are  
591 still in use. As next step, it would be valuable to employ CSD profiles to more precisely identify the superficial  
592 and deeper boundaries of the SC. To this end, spikes and LFPs would need to be recorded on at least one  
593 and ideally more contacts beyond the dorsal and ventral boundaries to evaluate the CSD. Additionally,  
594 interpretations will need to account for the different neuronal morphologies observed across layers<sup>1</sup> and  
595 for the consequences of mechanical damage induced by repeated electrode penetrations across the  
596 duration of the experiments.

597

## 598 **Materials & Methods**

599 *Animal preparation.*

600 All experimental and surgical procedures were approved by the Institutional Animal Care and Use  
601 Committee of the University of Pittsburgh and were in compliance with the U.S. Public Health Service policy  
602 on the humane care and use of laboratory animals. Two males, rhesus macaque monkeys (*Macaca*  
603 *mulatta*, ages 13 and 8 years) served as subjects. Surgical procedure details have been described  
604 previously<sup>73</sup>. Briefly, a recording chamber was placed on each animal to give access to the left and right  
605 colliculi. The chamber was tilted 40° posteriorly in the sagittal plane so that probe penetrations were

606 approximately normal to the SC surface. A 3-D printed angular adaptor was also used to adjust the  
607 penetration angle to maximize the collinearity of the saccade vectors obtained by stimulation (see below  
608 *Neurophysiological recordings*). Head restraint was realized by fitting a thermoplastic mask individually for  
609 each animal<sup>74</sup>.

610

#### 611 *Neurophysiological recordings.*

612 We used 16-channel laminar probes (Alpha-Omega, Alpharetta, USA; 150 $\mu$ m inter-contact  
613 distance; ~300 $\mu$ m diameter; ~1M $\Omega$  impedance for each channel) to record neural activity across different  
614 layers of the SC (Figure 1a). The probe was advanced with a hydraulic Microdrive (Narishige, Tokyo,  
615 Japan). When neural activity was detected on one channel, biphasic electrical stimulation (40 $\mu$ A, 400Hz,  
616 200ms; 200 $\mu$ s pulse duration, 17 $\mu$ s inter-pulse duration) was delivered to the deepest contact to determine  
617 its ability to evoke a saccade. Once verified that an intermediate layer of SC was reached, the probe was  
618 lowered further until multi-unit activity could be detected on the maximum number of contacts. Electrical  
619 stimulation was delivered on different channels to qualitatively gauge that induced saccades had similar  
620 characteristics (direction and amplitude) across depths and to estimate the average vector. On a subset of  
621 sessions, stimulation was applied systematically on each channel and recorded to provide a quantitative  
622 analysis. This vector was used as a measure of the preferred saccade for all units recorded along the  
623 different contacts across depths. The saccade endpoint, relative to central fixation, was taken as the  
624 location of the center of the visual receptive field. The diametrically opposite location was defined as the  
625 anti-receptive field position.

626

#### 627 *Data collection.*

628 Neurophysiological signals were recorded using the Scout data acquisition system (Ripple, Salt  
629 Lake City, USA). Data recording was synchronized with the beginning of the trial, and the timing of all trial  
630 events were recorded simultaneously with raw neural activity. For each channel, the raw activity was parsed  
631 into spiking activity (high pass filter at 250Hz and threshold at 3.5 times the RMS) and local field potential  
632 (low pass filter at 250Hz). As the isolation of single neural activity was not achievable simultaneously on  
633 every channel, the recorded spiking activity was always considered as being from multiple units in the  
634 vicinity of each contact. A standard threshold crossing was used to determine spike times.

635

#### 636 *Behavioral paradigms.*

637 After recovery from surgery, each animal was trained to perform standard eye-movements tasks.  
638 Eye movements were recorded using an infrared eye-tracker (EyeLink 1000 from SR Research, Ottawa,  
639 Canada; RRID:SCR\_009602). The camera and the infra-red illuminator were situated vertically above the  
640 animal's head. A hot-mirror was tilted ~45° between the animal's head and the display monitor. EyeLink  
641 software sampled the pupil at 1KHz in the reflected infra-red image, using its center as gaze position.  
642 Calibration of gaze position was performed for each session by having the animal fixate targets displayed

643 at known locations on the monitor. A real-time system was used for the control of the behavioral tasks and  
644 data acquisition<sup>75</sup>. Animals were trained to perform two standard eye movement tasks (Figure 1b): a  
645 visually-guided delayed saccade task (VG) and a memory-guided delayed saccade task (MG). At the  
646 beginning of a VG trial, a fixation dot appeared at the center of the screen. The animal had 3000ms to bring  
647 its line of sight towards it and maintain its fixation for 200 to 350ms. Then a second dot (target) appeared  
648 at a specific location on the screen. The animal had to keep its line of sight on the fixation dot for an  
649 additional 600 to 900ms. At the end of this delay period, the fixation dot disappeared (“go” cue) and the  
650 animal had to make a saccade toward the target within 500ms. The animal had to fixate the target for at  
651 least 250ms in order to get a liquid reward and for the trial to be successful. If one of these conditions was  
652 not respected, the trial was aborted. The timeline for an MG trial was the same as for a VG trial except that  
653 the saccade target remained illuminated only for a fixed period of time (300ms). The animal was then forced  
654 to maintain the target position in memory for the remaining of the trial. The two types of trial were typically  
655 randomly interleaved. Target locations were randomly interleaved between two locations: the center of the  
656 receptive field of the neural activity and the diametrically opposite location (see above *Neurophysiological*  
657 *recordings*). We only present data from trials with the target in the response field.

658

#### 659 *Neural activity analysis.*

660 During the delayed saccade tasks, neural activity typically increases or bursts shortly after stimulus  
661 presentation in the receptive field and/or during a saccade directed to that target. In between the two bursts,  
662 many SC neurons exhibit a low-frequency discharge see Figure 1 of ref.<sup>21</sup>. We therefore analyzed activity  
663 separately for the visual epoch that follows target onset, the delay period that follows the visual burst and  
664 continues until fixation point is extinguished, and the movement-related epoch that ensues the ‘go’ cue.  
665 Neural activity analyses were performed either on discrete spike trains or continuous spike density  
666 waveforms obtained by convolving the spikes with a kernel simulating an excitatory post-synaptic potential  
667 (growth and decay times constants of 1ms and 20ms, respectively)<sup>76</sup>. All data analyses were performed in  
668 MATLAB (Mathworks, Natick, USA; RRID: SCR\_001622).

669 Visual activity: The study of neural response to a stimulus is traditionally performed by aligning the  
670 data on target presentation. This approach effectively ignores the trial-to-trial variability in both the actual  
671 time of target presentation (due to frame rate limit) and neuronal stochasticity. We were concerned that this  
672 variance may be greater than the time spanned for the visual response to emerge across layers. Therefore,  
673 we opted to analyze activity during the visual epoch by aligning the data on visual burst onset. We applied  
674 on the spike train for each trial and channel the ‘Poisson surprise’ method<sup>24</sup> to detect burst onset in the  
675 epoch [30 150]ms following target onset. Burst detection criteria were set to a minimum of 3 spikes and a  
676 surprise index of  $-\log(0.025)$ . For each session, the channel with the maximum number of trials with  
677 detected bursts was selected as the *alignment channel*. Trials for which no burst was detected on the  
678 alignment channel were discarded. For every remaining trial, the visual burst on the alignment channel  
679 was used to align the activity of all the other channels. Note that the activity on all the other channels was

680 used regardless of whether a burst was detected on them. The realigned spike train for each channel was  
681 converted to a spike density function and then averaged across trials.

682 We next determined the relative burst onset times across the channels (Supplementary Figure 2).  
683 First, each trial-averaged spike density waveform was baseline-corrected by the mean activity computed  
684 on the same channel in the [-150 -50]ms epoch relative to visual burst onset. Next, the time of peak visual  
685 activity ( $P_v$ ) was detected in the epoch [-50 150]ms around the visual burst onset. We then performed a  
686 procedure to statistically compare the distribution of activity in two sliding 20ms-windows  $W_1$  and  $W_2$   
687 (Supplementary Figure 2a). The number of points in each distribution was equal to the number of time  
688 points in the window, and  $W_2$  was always shifted 10ms earlier in time relative to  $W_1$ . Initially,  $W_1$   
689 corresponded to the window [ $P_v-20 P_v$ ]ms, and  $W_2$  to the window [ $P_v-30 P_v-10$ ]ms. Both windows slid to  
690 earlier times in 1ms steps until  $W_2$  reached the window [-50 -30]ms (i.e. the beginning of the visual epoch).  
691 For each instantiation, the statistical difference between the distributions of activity in  $W_1$  and  $W_2$  was  
692 measured using a  $t$ -test ( $p < 0.01$ ). Because both  $W_1$  and  $W_2$  started around the peak activity, their  
693 distributions were significantly different initially. Sliding to earlier times, the first instance (i.e. the beginning  
694 of  $W_1$ ) when their distributions became not significantly different and stayed not significant for the next 10  
695 iterations defined  $B_v$ , the first time point when the activity was not significantly different from baseline  
696 (Supplementary Figure 2b). This method was designed to account for the presence of a secondary peak in  
697 the visual epoch. Finally, a two-piecewise linear regression was computed to estimate the time point ( $L_v$ )  
698 when the spike density waveform started increasing towards  $P_v$  (Supplementary Figure 2c,d). The  
699 regression analysis identified the intervals [ $B_v L_v$ ] and [ $L_v P_v$ ], respectively, where  $L_v$  minimized the sum  
700 of the residuals of the two linear fits and represented our estimate of the visual latency.

701 Delay-period activity: To examine the distribution of delay period activity across the dorsoventral  
702 axis, we plotted average, baseline-corrected activity in 50ms nonoverlapping bins on each channel. The  
703 bins spanned from the time of the last peak of the visual burst (there were often two) to the end of the  
704 shortest delay period. The method typically yielded 5 to 6 bins for analysis. Baseline activity was the same  
705 used for visual epoch analysis.

706 Movement-related activity: Trial-averaged spike density waveforms were aligned on saccade  
707 onset, which was detected using a velocity criterion (30deg/s) applied after 'go' cue. Each signal was also  
708 corrected for baseline activity, defined as the average activity in the epoch [-100 0]ms relative to 'go' cue.  
709 The movement-related activity was separated into two periods. The peri-saccadic or movement-related  
710 burst was quantified as the baseline-corrected average activity in the epoch [-25 25]ms centered on  
711 saccade onset. This parameter was used for analyses that computed activity levels during the burst and  
712 the visuo-motor index (see below). We also defined a pre-saccadic epoch that started at the go cue and  
713 continued until saccade onset. Neural activity in this window was analyzed to detect the presence and the  
714 onset of *buildup* and *burst* in activity (Supplementary Figure 3). In terms of stochastic accumulator  
715 framework e.g.,<sup>65</sup>, this is equivalent to detecting when the activity begins to accumulate, while accounting  
716 for trends induced by baseline activity, and when it transitions into a burst. The objective was to detect up

717 to three events in this period:  $E1$ , corresponding to the time of significant change of activity compared to  
718 baseline (which may include a linear trend, see below);  $E2$ , denoting when activity begins to accumulate  
719 and corresponding to a 'hinge' point prior to  $E1$ ; and  $E3$ , marking when the activity starts to burst and  
720 corresponding to a 'hinge' point occurring between  $E2$  and  $P$ , the time of peak activity around saccade  
721 onset. To be able to flexibly detect one and/or two separate events (and subsequently onsets of *buildup*  
722 and/or *burst* activity), the Poisson surprise method used before for the estimation of the visual onset latency  
723 was discarded in favor of a 2-piecewise linear regression-based approach. We sought to limit the number  
724 of ad-hoc parameters while relying on statistical measures of significance through data bootstrapping. Also,  
725 this analysis was limited to saccades produced in the standard latency range of 200 to 400ms.

726 As an initial step in our analysis, we applied a detrending procedure to remove any potential bias  
727 contributed by the low-frequency discharge from the delay period, well before the buildup and/or burst  
728 processes are engaged. A linear trend was estimated between in the epoch [300 200]ms before saccade  
729 onset. The obtained linear trend was extrapolated to the remaining time points and subtracted from the  
730 trial-averaged activity. Note that this step was only temporary and that all event detections after event  $E1b$   
731 (see below) were performed on the raw, non-detrended data.

732 Event  $E1$  was defined as the first time-point starting 200ms before saccade onset for which the  
733 activity became and remained significantly different from baseline for at least 100ms. Baseline was taken  
734 as the distribution of activity during the 100ms period preceding the 'go' cue on each trial. The number of  
735 points in the baseline distribution was equal to the number of time points in the window multiplied by the  
736 number of trials. Statistically significant difference was measured using a  $t$ -test between the distribution of  
737 baseline activity and the distribution of activity across trials at each 1ms time bin ( $p < 0.01$ ). To obtain a  
738 robust estimate of  $E1$  and to measure confidence intervals, subsets of trials were created through  
739 bootstrapping. An estimate of  $E1$  (denoted  $E1b$ ) was obtained for each bootstrap iteration. Supplementary  
740 Figure 3a provides a visualization of the method for one bootstrap. We used 100 bootstrapped estimates  
741 (Supplementary Figure 3c) and defined  $E1$  as the average of all 100  $E1b$  (Supplementary Figure 3e, left).  
742 Confidence intervals (CIs) were used as a measure of the reliability of the estimation of  $E1$  and computed  
743 as the 95% quantile of the  $E1b$  distribution (Supplementary Figure 3e, right). For all events, CIs were  
744 normalized with the average size of the search window. For  $E1b$ , the size of the search window was  
745 constant at 200ms. To exclude unreliable estimation of  $E1$ , a 0.6 threshold was applied on the total range  
746 of CIs. This threshold was the only ad-hoc parameter in the algorithm and the same value was used for all  
747 events (which was allowed by the normalization of the CIs). The threshold value was chosen in order to  
748 remove very unreliable estimations (for example for event  $E1$ , the excluded estimations had CIs superior  
749 to 120ms). Changing the threshold value (e.g. to 0.5 or 0.4) did not alter the general trend of the results  
750 (data not shown). With this method,  $E1$  is the latest time point of statistically significant change from baseline  
751 activity. The actual change, indicating the onset of accumulation, most likely occurs prior to it. Thus, we  
752 next operated on the non-detrended averaged spike density waveform to obtain a better estimate of the  
753 actual time of change from baseline activity, while imposing the constraint of  $E1$ .

754 Event  $E2$  denotes the time point before  $E1$  when the activity starts deviating from the ongoing  
755 activity and displays what we refer to a 'hinge point', which we define as the time point at which the rate of  
756 change of the spiking activity deviates from its current trend (see Supplementary Figure 3g for a general  
757 visualization). The hinge point was detected by finding the best piecewise linear regression for the relevant  
758 data points. For each bootstrapped estimation  $E1b$ , a piecewise linear regression was performed on the  
759 intervals  $[E1b-100 Hb]$  and  $[Hb E1b]$ , respectively, and the value of  $Hb$  that minimized the sum of the  
760 residuals of the total fit was the estimate of  $E2b$ . The combination of the search windows of  $E1b$  and of  $E2b$   
761 relative to  $E1b$ , implies that  $E2b$  was searched in a potentially very large window starting 300ms before  
762 saccade onset and ending as late as  $P$ . By definition,  $E2b$  always preceded  $E1b$  or was equal to it.  $E2$  was  
763 taken as the average of all the bootstrapped estimates of  $E2b$ . As before, we performed 100 bootstrapped  
764 estimations and computed the CIs, which were normalized by 100ms. To exclude an unreliable estimate of  
765  $E2$ , a 0.6 threshold was applied on the total range of the normalized CIs (Supplementary Figure 3e,f).

766 Event  $E3$  marks when the activity starts to burst and corresponds to the hinge point occurring  
767 between  $E2$  and  $P$ , the time of peak activity around saccade onset. For each round of bootstrapping, we  
768 obtain  $E2b$  as stated above and an estimate of the time of peak activity ( $Pb$ ). Then we estimated the hinge  
769 point  $E3b$  by fitting a two-piecewise linear regression between  $E2b$  and  $Pb$ . The detection of the slopes of  
770 the two linear regressions around  $E3b$  are stored for statistical analysis. By definition,  $E3b$  is always  
771 between  $E2b$  and  $Pb$ .  $E3$  was taken of the average of all the bootstrapped estimates  $E3b$ . To exclude an  
772 unreliable estimate of  $E3$ , a 0.6 threshold was applied on the total range of the CIs, which normalized by  
773 the average interval between  $E2b$  and  $Pb$ .  $E3$  was considered a hinge point only if the CIs of the distribution  
774 of the slopes of the two linear regressions before and after all  $E3b$  were not overlapping (this is a  
775 conservative measure of significance). Hence, all estimated  $E3$  values correspond to a hinge point with a  
776 significant change of rate of activity around this time (Supplementary Figure 3d,f,g). Also,  $P$  was taken as  
777 the average of all  $Pb$  and confidence intervals were computed (Supplementary Figure 3c,e).

778 Classification of events into *buildup* and *burst* activity: Once estimated, these events were used to  
779 categorize the pre-saccadic discharge pattern into *buildup* or *burst* activity (Supplementary Figure 3h). To  
780 avoid any confusion with previous literature<sup>26,27</sup>, we used the terms *buildup* and *burst* with an italic  
781 typography to refer to these events with a definition specific to this study. We started with the subset of  
782 channels across all sessions for which both  $E2$  and  $E3$  were both detected and were significantly different  
783 from each other (i.e., their confidence intervals did not overlap). A distribution of the event times exhibited  
784 visual separation around -50ms relative to saccade onset (data shown in Results in Figure7k,l,m ). We  
785 therefore used this boundary to distinguish *buildup* (<-50ms) from *burst* (>-50ms) events. We similarly  
786 examined the distribution of times when only one of the two events was detected, and we once again used  
787 the -50ms boundary criterion to classify the event. Thus, it was possible that activity associated with event  
788  $E2$  ( $E3$ ) in the absence of  $E3$  ( $E2$ ) to be classified as a burst (*buildup*) activity.

789

790 *Neuronal activity categorization.*

791 Existing literature uses nomenclature for categorizing the cell types in the SC (and other structures,  
792 such as FEF) depending on their significant activity during the visual or the peri-saccadic movement epoch.  
793 We also performed analyses to determine how neurons based on this classification vary with depth. Only  
794 channels with statistically significant neural activity in at least one of the two intervals were included in the  
795 subsequent analyses. To measure the significance of the activity during the visual epoch, we used spike  
796 density data aligned on visual burst onset but not baseline-corrected. The significance was measured using  
797 a statistical test carried out between the distribution across trials of the activity during the visual epoch and  
798 the activity during baseline (Wilcoxon rank sum test,  $P < 0.001$ ). To discard very low activity after baseline  
799 correction, an additional low threshold (10spk/s) was used on the trial-averaged baseline-corrected activity  
800 and averaged across the visual epoch. We used the same procedure to measure the statistical significance  
801 of the activity during the movement epoch with data aligned on saccade onset and baseline activity  
802 measured on data aligned on 'go' cue (see above). Based on this measure of significance of activity in each  
803 epoch, the MUA on each channel was categorized as follows: visual-only activity (significant visual activity  
804 and not significant movement activity); visuo-movement activity (significant visual and movement activity);  
805 movement-only activity (not significant visual activity and significant movement activity).

806 The visuo-movement index (VMI) contrasts the visual and the movement activity of multi-unit  
807 activity (MUA) during the delayed saccade tasks. The visual activity ( $V$ ) is the baseline-corrected average  
808 activity in the epoch [0 100]ms following visual burst onset (see above *Neural data analyses*). The  
809 movement activity ( $M$ ) is the baseline-corrected average activity in the peri-saccadic epoch [-25 25]ms  
810 centered on saccade onset. We defined the index as  $VMI = (M - V)/(M + V)$ . With this formulation,  $VMI =$   
811  $-1$  corresponds to a visual neuron with no saccade related activity while  $VMI = +1$  corresponds to a  
812 movement neuron with no visual response. We also computed VMI trends when average activity in each  
813 epoch is replaced with peak activity and when baseline activity for the movement epoch is measured before  
814 target onset. VMI results were qualitatively similar for these variations (data not shown).

815

816 *Depth alignment of multiple sessions.*

817 The above analyses focus on population neural activity across SC layers within a session. To  
818 assess reliability, data must be averaged across sessions, which required appropriate alignment of data  
819 collected in each penetration. To address this issue, we designed a method based on current-source  
820 density analysis (CSD)<sup>77</sup>, which computes the second spatial derivative of LFPs and provides an estimate  
821 of the distribution of the current sinks and sources as a function of space and time in a volume of tissue.  
822 We estimated the CSD using the *csdplotter* toolbox that contains the implementation of the iCSD method  
823 (<https://github.com/espenhgn/CSDplotter>)<sup>78</sup>. Supplementary Figure 1 demonstrates the utility of the CSD  
824 method for the depth alignment of two datasets recorded at two different locations 1mm apart along the  
825 same penetration. Panels a and d display average LFP signals recorded at each contact at two locations  
826 1mm apart along the same penetration. The LFPs showed a large decrease reflecting the input current

827 following the display of the target. The CSD plots of the two datasets (panels b and e) revealed a strong  
828 current sink (orange bands) occurring after target onset and which encompassed almost 1mm of SC tissue.  
829 This feature was present in the recordings at both locations but translated in depth. The lower bound of the  
830 sink pattern was at 1.28mm and 1.87mm in panels b and e, respectively. Such a strong sink appeared  
831 systematically after target onset across all recording sites (data not shown here, but subject to a future  
832 manuscript). We exploited this feature to align the data across sessions. The lower bound limit of the sink  
833 pattern was used as a reference for estimating the relative depth of the probe. Supplementary Figure 1c,f  
834 shows the average profile of the CSD in a 150ms window starting before burst onset. The transitions from  
835 negative to positive CSD was detected automatically and visually inspected to account for the rare cases  
836 when the sink pattern was not continuous due to decreased SNR of the LFP. To assess the utility of the  
837 CSD alignment method, we compared the relationship between depth and visuo-motor index (VMI, see  
838 below) at the two depths (panel g). The two VMI plots appear very similar but shifted in depth. After  
839 alignment using the CSD method, the two VMI graphs overlap very well (panel h).

840 For aligning data by depth across recording sessions, the channel closest to the transition from  
841 negative to positive CSD was identified. We termed it the reference channel and assigned it index 0 in  
842 plots presenting data after alignment. The indices of the remaining channels were shifted accordingly. Note  
843 that the alignment was done in terms of channel index and not in actual mm, which would require an  
844 interpolation of the signals between the channels. Given that the inter-contact distance of the probe is  
845 150 $\mu$ m, the maximum error of alignment based on channel index is 75 $\mu$ m. Supplementary Figure 1i shows  
846 the average CSD profile of all sessions and for both VG and MG trials. It highlights the robustness of the  
847 detection of the CSD reference channel and the systematic presence of a sink pattern above it (i.e., negative  
848 values of the CSD profile). Note that if depth alignment between datasets is necessary (i.e. the probe's  
849 depth position is different across datasets), then there exists at least one non-overlapping channel between  
850 them. Thus, if any of these non-overlapping channels contains significant activity, then the total number of  
851 channels across which data can be analyzed may be larger than the total number of channels of the probe.  
852 In practice, only few channels were added and all data analysis that required depth alignment will be  
853 presented between channels -8 and 8 (17 channels).

854

#### 855 *Statistical analysis.*

856 Trial-averaged activity was computed using large numbers of trials. Confidence intervals were  
857 measured using bootstrapping (1000 bootstraps, *bootci* in MATLAB). Normality assumption was  
858 systematically assessed using a Kolmogorov-Smirnov test (*kstest* in MATLAB). When the hypothesis of  
859 normality was not rejected, a parametric test was applied (t-test, *ttest* in MATLAB) otherwise a non-  
860 parametric test was used (Wilcoxon rank sum test, *ranksum* in MATLAB). All tests were two-tailed.

861 To measure trends of latencies and activity amplitude across depths, we fitted a cubic function to  
862 the data of the form ( $ax^3 + bx^2 + cx + d$ ), where  $x$  is the depth within SC measured using channel index  
863 <sup>15</sup>. We chose higher order fits to capture non-monotonic trends across depths.  $R^2$  values were reported to



864 assess the goodness-of-fit. A P-value for each cubic fit was obtained using a permutation test. For each  
865 permutation, the index of the SC depth was shuffled and a new shuffled- $R^2$  value was obtained by fitting a  
866 new cubic function. 1000 permutations were done. The P-value was computed as the number of time  
867 shuffled- $R^2$  values were superior or equal to the un-shuffled  $R^2$  value, divided by the number of  
868 permutations. A P-value inferior to 0.05 indicated a significant fit and, hence, that the data displayed a  
869 significant trend across depths.

870

#### 871 **Acknowledgements**

872 Funding for this research was provided by NIH grants R01 EY022854 and R01 EY024831.

873

#### 874 **Author contributions**

875 Design of study: CM, NJG; Experimental Data acquisition: CM, UKJ; Data analysis: CM; First draft  
876 of paper: CM; Writing and editing: CM, NJG; Final edits and proofing: CM, NJG, UKJ

877

#### 878 **Competing interests**

879 The authors declare no competing interests.

880

#### 881 **Materials & Correspondence**

882 Corentin Massot, Email: [corentinmassot@yahoo.fr](mailto:corentinmassot@yahoo.fr)

883

#### 884 **Data and code availability**

885 All data and code are available upon requests to Corentin Massot, Email:

886 [corentinmassot@yahoo.fr](mailto:corentinmassot@yahoo.fr)

887

888 **Figure legends**

889

890 **Figure 1. Laminar recording across the dorsoventral extent of SC.** (a) Schematic of SC laminar  
891 structure and laminar probe. The probe (150 $\mu$ m inter-contact distance;  $\sim$ 300 $\mu$ m diameter) is drawn roughly  
892 to scale with the SC sketch. SL (superficial layers), OL (optic layers), IL (intermediate layers), DL (deep  
893 layers) (modified from <sup>79</sup>). (b) Visual illustrations of the visually-guided (VG) and memory-guided (MG)  
894 delayed saccade tasks. See text for details.

895

896 **Figure 2. Example data of laminar recording from a single session.** (a) Plots of trial-averaged spike  
897 density waveforms for each channel, aligned on visual burst onset ( $t = 0$  ms). The method for aligning on  
898 burst is described in Methods section. The waveform on each contact is scaled and shifted vertically for  
899 visualization. The dashed vertical blue lines show the boundaries of the visual epochs used in panel c. Data  
900 are from VG task. (b) Trial-averaged waveforms aligned on saccade onset, using the same convention  
901 used in panel a. (c) The average firing rates during the visual (dashed blue line) and movement (solid blue  
902 line) epochs are plotted as a function of depth. (d) The visuomotor index (VMI) is plotted as a function of  
903 depth. Negative and positive VMI values denote greater visual and movement related activities,  
904 respectively. Vertical line denotes VMI=0. (e-h) Data for MG trials from the same session. Display  
905 convention is same as for panels (a-d).

906

907 **Supplementary Figure 1. Alignment procedure based on LFP and CSD profiles.** (a) Plots of trial-  
908 averaged LFP signals for one recording session with a 16-channel linear probe during a VG task; signals  
909 have been offset vertically to distinguish the activity on the different channels; channel 1 and 16 correspond  
910 to the most ventral and most dorsal contacts, respectively. Data are aligned on target onset. (b) Plot of CSD  
911 signal obtained from the LFP signals in (a), obtained with the iCSD method in the *csdplotter* toolbox  
912 (<https://github.com/espenhgn/CSDplotter>)<sup>78</sup>. Negative and positive values correspond to current sinks and  
913 sources, respectively. (c) Another representation of the CSD profile (left panel). It shows the temporal  
914 average of the CSD values computed over the 150ms window following the sink onset (right panel). The  
915 horizontal line represents the depth of the crossing from negative to positive CSD values. This crossing is  
916 taken as the depth of reference for the alignment procedure. (d-f) Figures resulting from the same analysis  
917 as (a-c) for data recorded during the same session and for the same penetration but with the probe  $\sim$ 1mm  
918 shallower in SC. (g) The VMI as a function of depth for the two examples presented in (a) (depth 1 in blue)  
919 and (d) (depth 2 in red); the horizontal dashed lines indicate the CSD reference channels. (h) The VMI  
920 traces of the two examples are replotted after alignment based on the CSD analysis; the channels' index is  
921 reported on the left y axis. Channel 0 corresponds to the reference channel. The right y axis indicates the  
922 relative depth in mm. (i) The trace shows the CSD profile averaged across all sessions, not just the two  
923 examples from above, and for both VG and MG trials. The red translucent region surrounding the average  
924 CSD profile represents 95% confidence interval.

925  
926 **Figure 3. Population-averaged visual and motor activity.** The peak firing rate averaged across sessions  
927 during the visual (dashed trace) and movement (solid traces) are plotted as a function of channel number  
928 or depth for VG (panel a; blue traces) and MG (panel b; red traces) tasks. (c) The session-averaged VMI is  
929 plotted against depth for VG (solid blue line) and MG (solid red line) trials. For all panels, the channel index  
930 is reported on the left ordinate axis. Channel 0 corresponds to the CSD reference channel that was used  
931 to align the data across sessions (see *Materials and Methods*). The right ordinate axis indicates the relative  
932 depth in mm. The blue and red translucent regions surrounding same color traces in all three panels  
933 represent 95% confidence interval of the VG and MG trials, respectively.

934  
935 **Figure 4. Categorization of SC neurons.** Every panel shows the distributions of visual-only (V, blue trace),  
936 visuo-movement (VM, green trace) and movement-only (M, red trace) neurons as a function of channel  
937 number. Data are pooled across 20 VG sessions (a) and 11 MG sessions (b). In each subplot, the abscissa  
938 denotes the proportion of neurons. Left: For each channel, the neuron count (either for each category or  
939 for all neurons) across all sessions is normalized by the number of sessions (20 for VG and 11 for MG  
940 trials). Right: The neuron count is normalized individually for each channel to compensate for the non-  
941 uniform sampling of neurons across depths (i.e., the neuron count becomes 1 on every channel). (c) A  
942 summary of the percentages of each type of neuron for VG and MG trials.

943  
944 **Figure 5. Population-averaged delay period activity within SC.** Each trace represents mean activity in  
945 a specific interval as a function of depth and averaged across sessions for (a) VG and (b) MG tasks. The  
946 black traces is the mean activity in the visual epoch; it is identical to the dashed traces in Figure 3a,b. The  
947 remaining traces are averages computed over nonoverlapping 50ms bins starting from the last peak of the  
948 visual burst across channels (blue, 'Bin 1') to the end of the shortest delay period (orange, 'Bin 6'). The  
949 colored translucent regions surrounding the thick traces represent the 95% confidence interval computed  
950 across sessions.

951  
952 **Supplementary Figure 2. Visual latency detection.** (a) Baseline-corrected average spike density  
953 waveform (solid black trace).  $P_v$  is the peak activity detected in the [-50 150]ms epoch after target onset.  
954 The x-axis represents time relative to  $P_v$  for display purposes. The two sliding windows  $W1$  (dashed red)  
955 and  $W2$  (dashed blue) are represented at their initial positions; a statistical difference between the  
956 distributions of activity in  $W1$  and  $W2$  is measured using a t-test; the test is significant at the initialization  
957 ( $P < 0.01$ ). (b) Both windows slide to earlier times in 1ms steps; the t-test is performed at each time step;  $B_v$   
958 is the first time point (measured relative to the beginning of  $W1$ ) when the t-test indicates a non-significant  
959 difference and stays not significant for the next 10 steps. (c) A two-piecewise linear regression is computed  
960 between  $B_v$  and  $P_v$ . (d)  $L_v$  is the time point that minimizes the residuals of the two-piecewise linear  
961 regression and represents the onset of the visual burst.

962

963 **Figure 6. Visual latencies.** (a) Data from example VG session showing trial-averaged spike density  
964 functions aligned on visual burst onset (see *Materials and Methods*); vertical tick marks indicate the onset  
965 of the detected visual activity for each channel;  $t = 0$  ms corresponds to the onset of the visual activity on  
966 the visual alignment channel (here, channel 11). (b) Plot of *relative* visual burst latencies across channels  
967 for the same dataset. The data are temporally aligned on the visual onset of the reference channel (here,  
968 channel 7), which is required to averaged data across sessions. Dashed trace is a cubic fit ( $r^2 = 0.84$ ). (c)  
969 Session-averaged relative visual onset latencies across depths for VG (thick blue line) and MG (thick red  
970 line) trials, respectively. The dashed traces are cubic fits applied separately to the VG (blue dashed trace;  
971  $R^2 = 0.66$ ) and MG distributions (red dashed trace;  $R^2 = 0.65$ ). The blue and red translucent regions  
972 surrounding the average latency estimations represent the 95% confidence interval computed across  
973 sessions; note that the CI of the reference channel is 0 because the activity of each session is temporally  
974 aligned to the latency onset of this channel.

975

976 **Supplementary Figure 3. Events detection and classification of activity during the pre-saccadic**  
977 **epoch.** (a) Average spike density waveform for one channel is shown for one bootstrap iteration (solid black  
978 trace). The near-horizontal, dashed black line is the linear trend estimated in [-300 -200]ms window. This  
979 trend was extrapolated to the remaining time points and subtracted from the trial-averaged activity to yield  
980 the dashed gray waveform. The time and amplitude at peak activity ( $Pb$ ) and when the detrended activity  
981 becomes significantly different from baseline ( $E1b$ ) for this bootstrap iteration are shown in black and green  
982 tick marks, respectively. The green dashed region delimits the search window of this event. (b) The original  
983 spike density waveform (black traces) now also overlays the 'hinge' points denoting *buildup* ( $E2b$ ; blue tick  
984 mark) and *burst* ( $E3b$ ; red tick mark) onsets for one bootstrap iteration. The blue and red dashed lines mark  
985 the search windows of the two events. (c,d) The spike density waveform is now shown with the distribution  
986 of each event for 100 bootstrap iterations. Subplots are separated for visualization. (e) Left: The mean  
987 estimates and confidence intervals (CIs) of events  $P$  (black) and  $E1$  (green) obtained from the 100 bootstrap  
988 iterations are shown respectively as solid and dashed tick marks. They are superimposed on the trial-  
989 averaged spike density function. Right: The normalized range of CI for  $E1$  is shown relative to an arbitrarily  
990 chosen threshold level indicated by the horizontal dashed line. (f) Left: Same format is used to shown the  
991 mean and CIs for events  $E2$  (blue) and  $E3$  (red). Middle: The normalized range of CI for  $E2$  is shown relative  
992 the same threshold level indicated by the horizontal dashed line. Right: The plot shows the means and CIs  
993 of the slopes of the regression fits before (yellow) and after (red) the hinge point of event  $E3$ . (g) A  
994 visualization of a hinge point detection from a two-piece linear regression analysis. The dashed lines  
995 indicated the best fit lines before (yellow) and after (red) the hinge point. (h) The final step of the analysis  
996 is to classify events  $E2$  and  $E3$  into *buildup* (cyan) and *burst* (purple) events (see *Materials and Methods*  
997 for criterion details).

998

999 **Figure 7. Example of events detection during the pre-saccadic epoch and classification.** The  
1000 detection of all events and their CIs are illustrated for trial-averaged spike density functions on all channels  
1001 for the VG task of an example session. Data are aligned on saccade onset. Mean event value is shown as  
1002 a solid, thick vertical tick mark. CIs are denoted as dashed, thin vertical lines of the same color and on each  
1003 side of the solid tick mark. Events *P*, *E1*, *E2* and *E3* are identified respectively in black, green, blue, and  
1004 red colors. (a-c) Neural activity waveforms are shown with mean and CIs of events *P* and *E1*. (d-h) Neural  
1005 activity waveforms are shown with mean and CIs of events *E2* and *E3*. (f,h) The mean and CIs of slopes of  
1006 the linear regressions before (cyan) and after (red) the hinge points are plotted as a function of channel  
1007 number for events *E2* and *E3*. (i) The spike density waveforms for all channels are now shown with average  
1008 values of the statistically significant events (see *Materials and Methods* for details). (j) The events are now  
1009 replaced classification into *buildup* (cyan) or *burst* (purple) events. (k-m) These classifications were  
1010 determined from the distributions of events *E2* and *E3* and depending on whether only one or both events  
1011 were detected. We used the -50ms boundary to classify the detected events into *buildup* and *burst* phases  
1012 of neural activity.

1013  
1014 **Figure 8. Laminar organization of onset latencies and amplitude of activity during pre-saccadic**  
1015 **epoch.** (a) Session-averaged onset latencies of events *P* (black trace), *E1* (green trace), *E2* (blue trace)  
1016 and *E3* (red trace) across depths for VG trials. (b) Session-averaged amplitude of the activity at the time of  
1017 the events *P*, *E1*, *E2* and *E3* across depths for VG trials. (c) Session-averaged onset latencies of *peak*  
1018 (copy of *P* in panel a, black trace), *buildup* (cyan trace) and *burst* (purple trace) neural activity across depths  
1019 for VG trials. (d) Session-averaged amplitude of the activity at the time of *peak* (copy of *P* in panel a, black  
1020 trace), *buildup* (cyan trace) and *burst* (purple trace) onsets across depths for VG trials; a scaled version of  
1021 the amplitude of *burst* activity relative to *peak* (see *Materials and Methods*) is shown in green; the applied  
1022 factor is 3.3. (e-h) Data for MG trials are shown following the same format used in panels (a-d) for VG task  
1023 data. (h) *Burst* activity pattern was multiplied by 2.4 to match the depth-dependent pattern of peak activity.  
1024 (d,h) Vertical dashed red lines indicate the maximum average activity of *peak* and *burst* for VG trials.  
1025 (c,d,g,h), dashed lines represent a cubic fit regression. In all panels, the color-matched translucent region  
1026 surrounding each trace represents the 95% confidence interval computed across sessions.

1027  
1028 **Figure 9. Classification of SC neurons based on pre-saccadic activity.** Every panel shows the  
1029 distributions of buildup-only (green trace), burst-only (purple trace) and buildup-burst (blue trace) neurons  
1030 as a function of channel number. Data are pooled across 20 VG sessions (a) and 11 MG sessions (b). The  
1031 figure follows the format of Figure 4. In each subplot, the abscissa denotes the proportion of neurons. Left:  
1032 For each channel, the neuron count (either for each category or for all neurons) across all sessions is  
1033 normalized by the number of sessions (20 for VG and 11 for MG trials). Right: The neuron count is  
1034 normalized individually for each channel to compensate for the non-uniform sampling of neurons across

1035 depths (i.e., the neuron count becomes 1 on every channel). (c) A summary of the percentages of each  
1036 type of neuron for VG and MG trials.

1037

1038 **Figure 10.** Saccade vector distribution across depths and across sessions. (a-e) Vector of the saccadic  
1039 eye movement induced by stimulation of each channel during example sessions; blue arrows indicate the  
1040 direction and amplitude of the induced saccades; blue dots indicate the absence of saccades after the  
1041 onset of the stimulation; bottom right corner displays the standard deviation of the direction ( $\theta$ ) and  
1042 amplitude ( $A$ ) of the saccade vector for the example session. (f) Distribution of the standard deviation of the  
1043 direction (left) and amplitude (right) across all sessions when the data from the stimulation paradigm was  
1044 recorded (12 sessions).

1045

1046 **Figure 11. Schematic representation of spatiotemporal dynamics of population activity in SC.** Visual  
1047 information initiates (purple dot) around the superficial and optic layers (SL, OL) and systematically later in  
1048 sequential order ventrally through the intermediate and deep layers (IL, DL). Neurons in the dorsal  
1049 intermediate layers produced the most vigorous visual burst, shown as the darkest of the gray shade. The  
1050 peak firing rate of the visual burst decreased with distance, indicated by lighter shades of gray. In the  
1051 ensuing delay period, SC neurons exhibit a more sustained low-frequency activity and with a laminar  
1052 organization that matches that of the visual burst. Approximately 100ms after the 'go' cue (blue dot;  
1053 presumably once fixation offset is processed), neurons around the center of the intermediate layers  
1054 gradually increase their firing rate. This buildup of activity appears later on adjacent layers both dorsally  
1055 and ventrally (diverging blue arrows), ultimately leading to a burst synchronously across the entire  
1056 dorsoventral extent of SC (red dots). Approximately 25-30ms later, a saccade is triggered. The layers with  
1057 maximal activity during the pre- and peri-saccade periods are shown in gray shades. Note that the SC layer  
1058 where activity begins to accumulate after the 'go' cue is also the layer that is maximally active during the  
1059 burst, and that neurons maximally active during the movement phase are located more ventrally than  
1060 neurons maximally active during the visual and delay periods. Rightward horizontal arrows indicate the  
1061 main outputs from SC and their projection structures (adapted from <sup>1</sup>).

1062

1063 **Figure 1**

1064

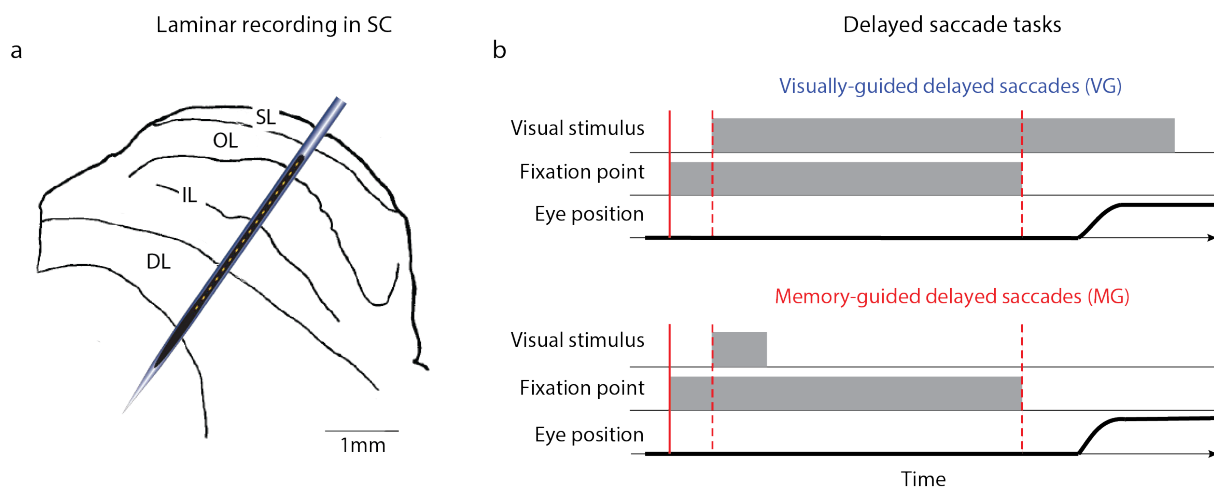

1065

1066

1067 **Figure 2**

1068

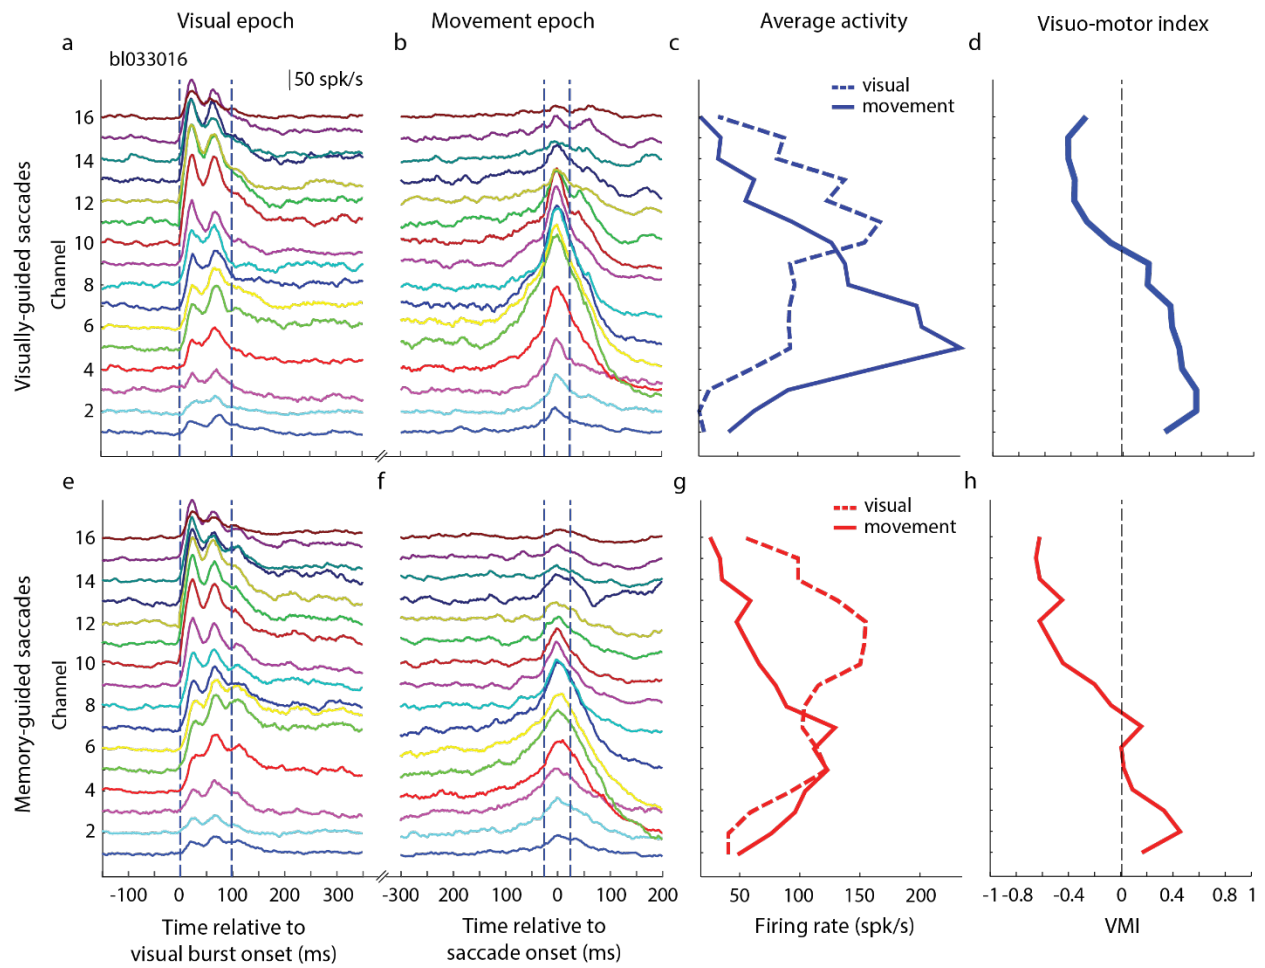

1069

1070



1071 **Supplementary Figure 1**

1072

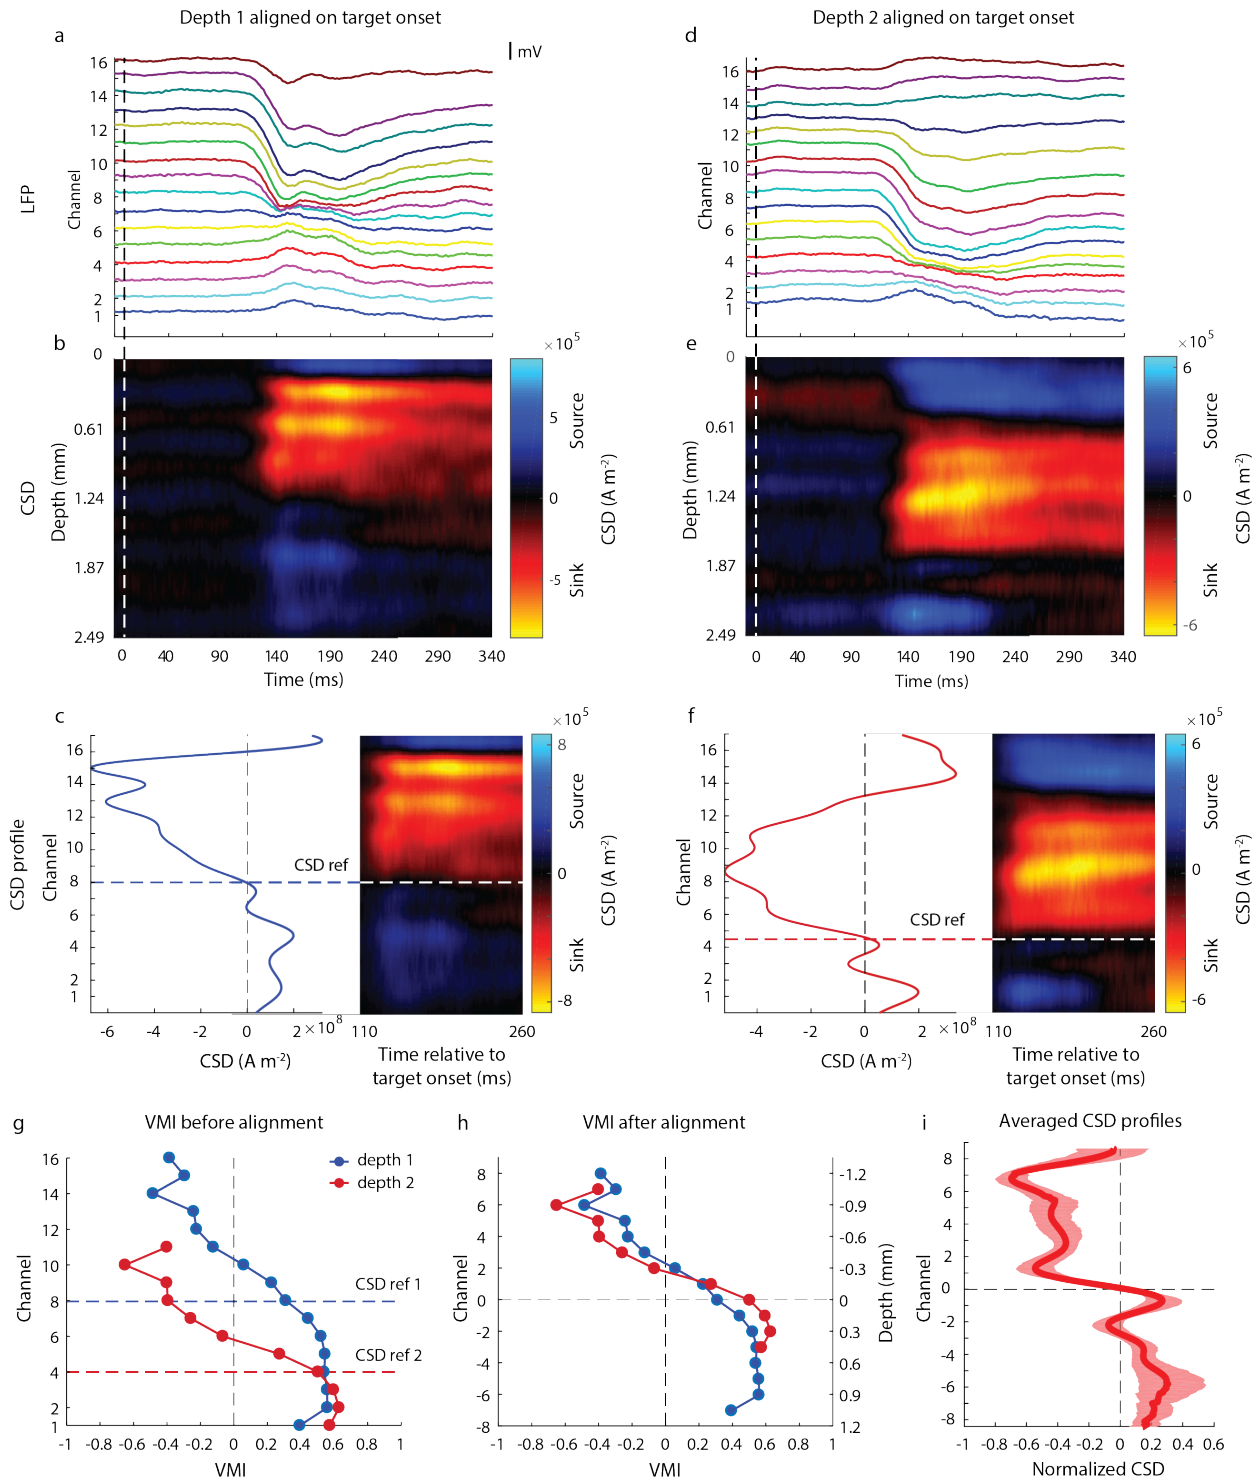

1073

1074

1075

1076 **Figure 3**

1077

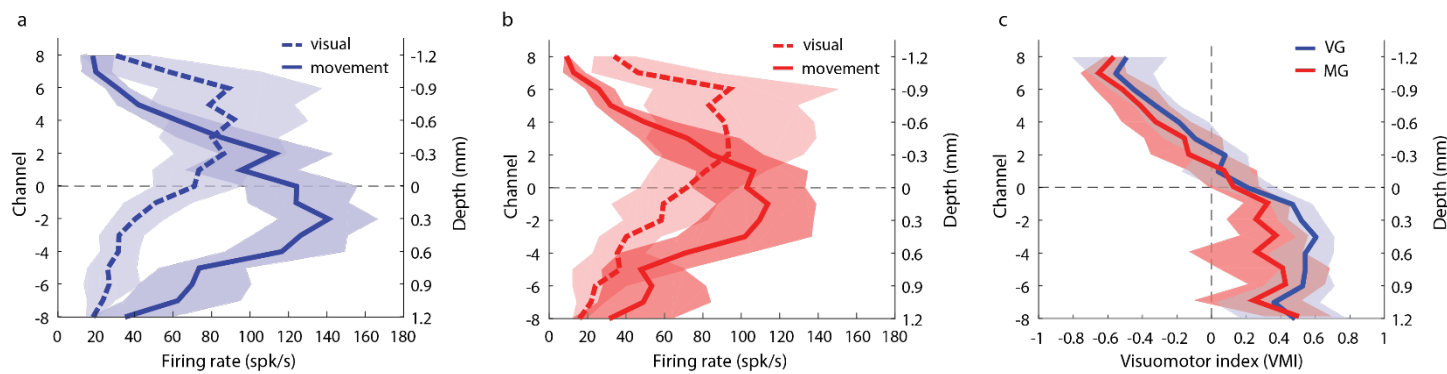

1078

1079

1080 **Figure 4**

1081

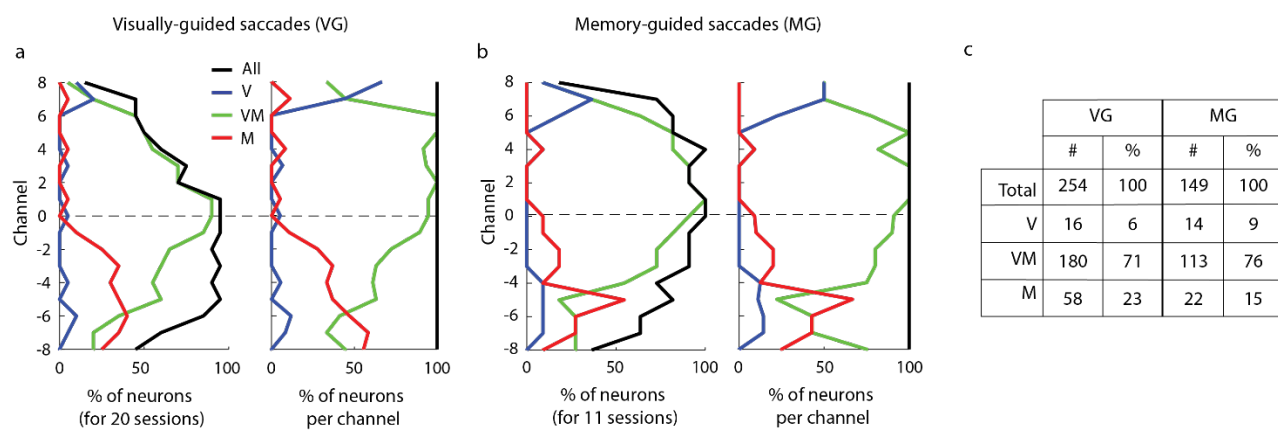

1082

1083

1084 **Figure 5**

1085

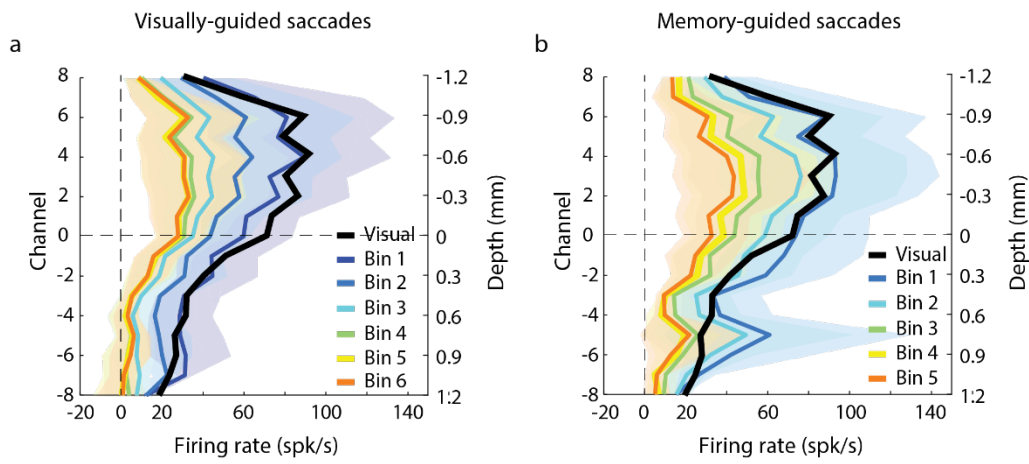

1086

1087

1088 **Supplementary Figure 2**

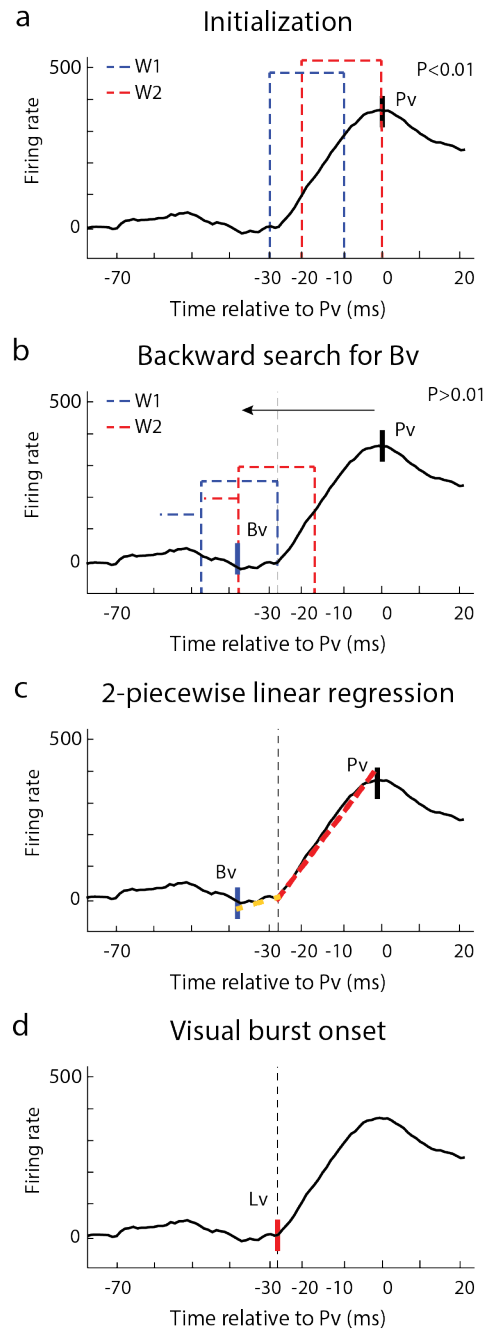

1089

1090

1091 **Figure 6**

1092

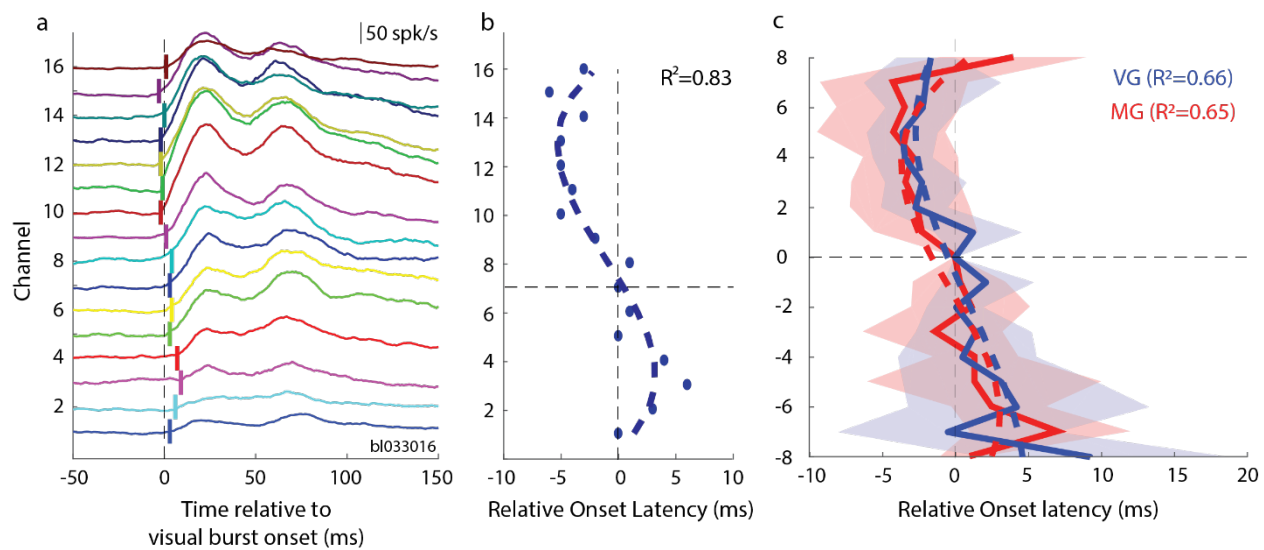

1093

1094

1095 **Supplementary Figure 3**

1096

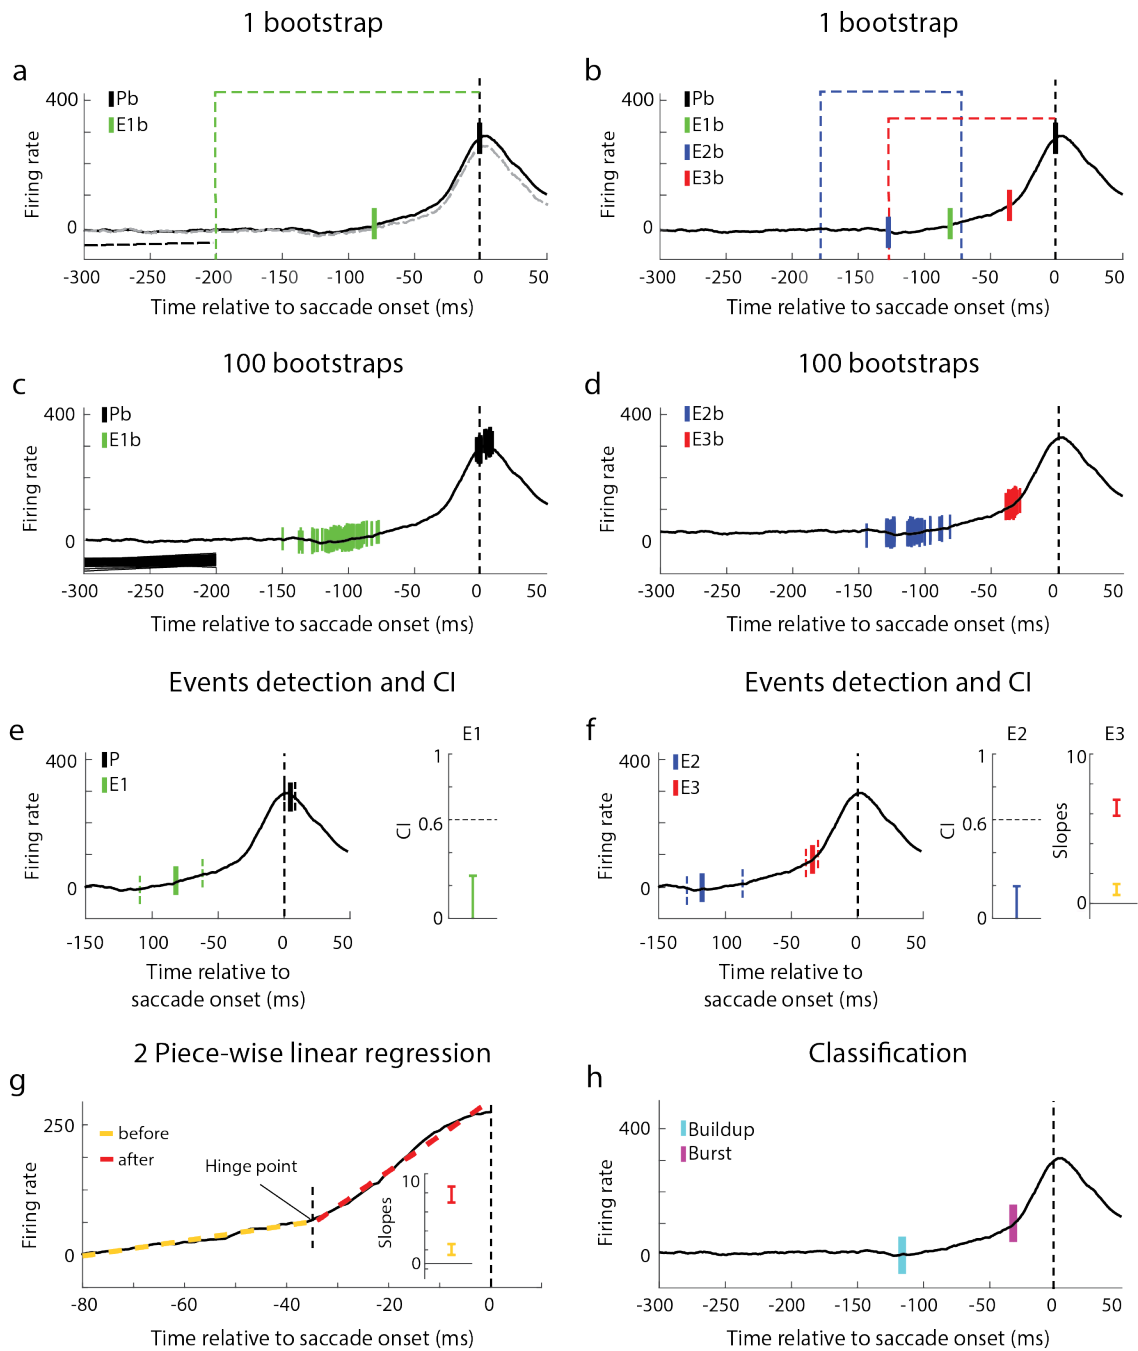

1097

1098

1099 **Figure 7**  
1100

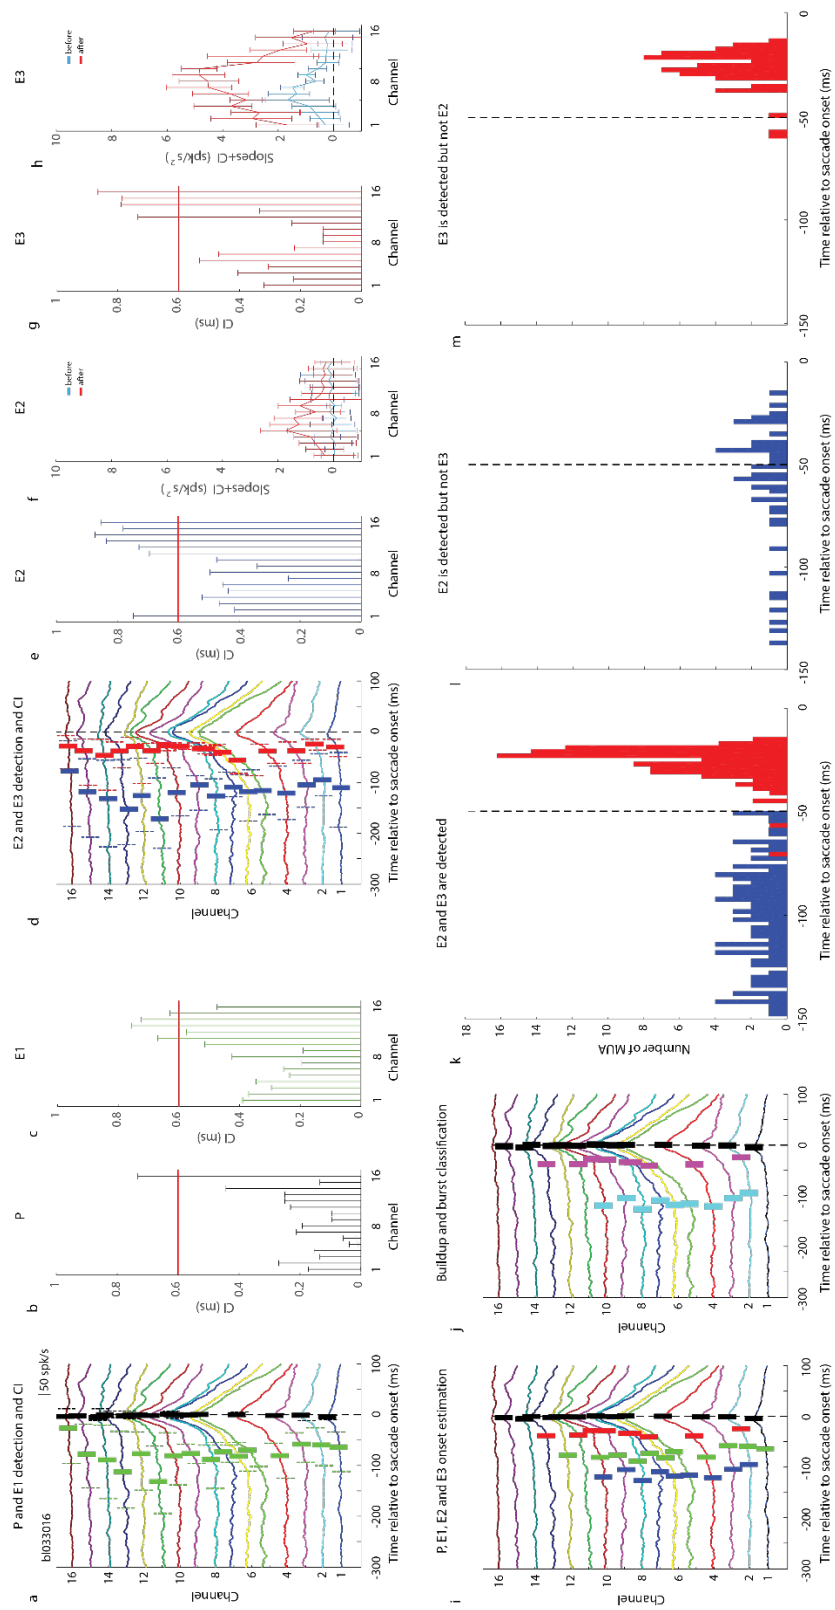

1101  
1102



1103 **Figure 8**

1104

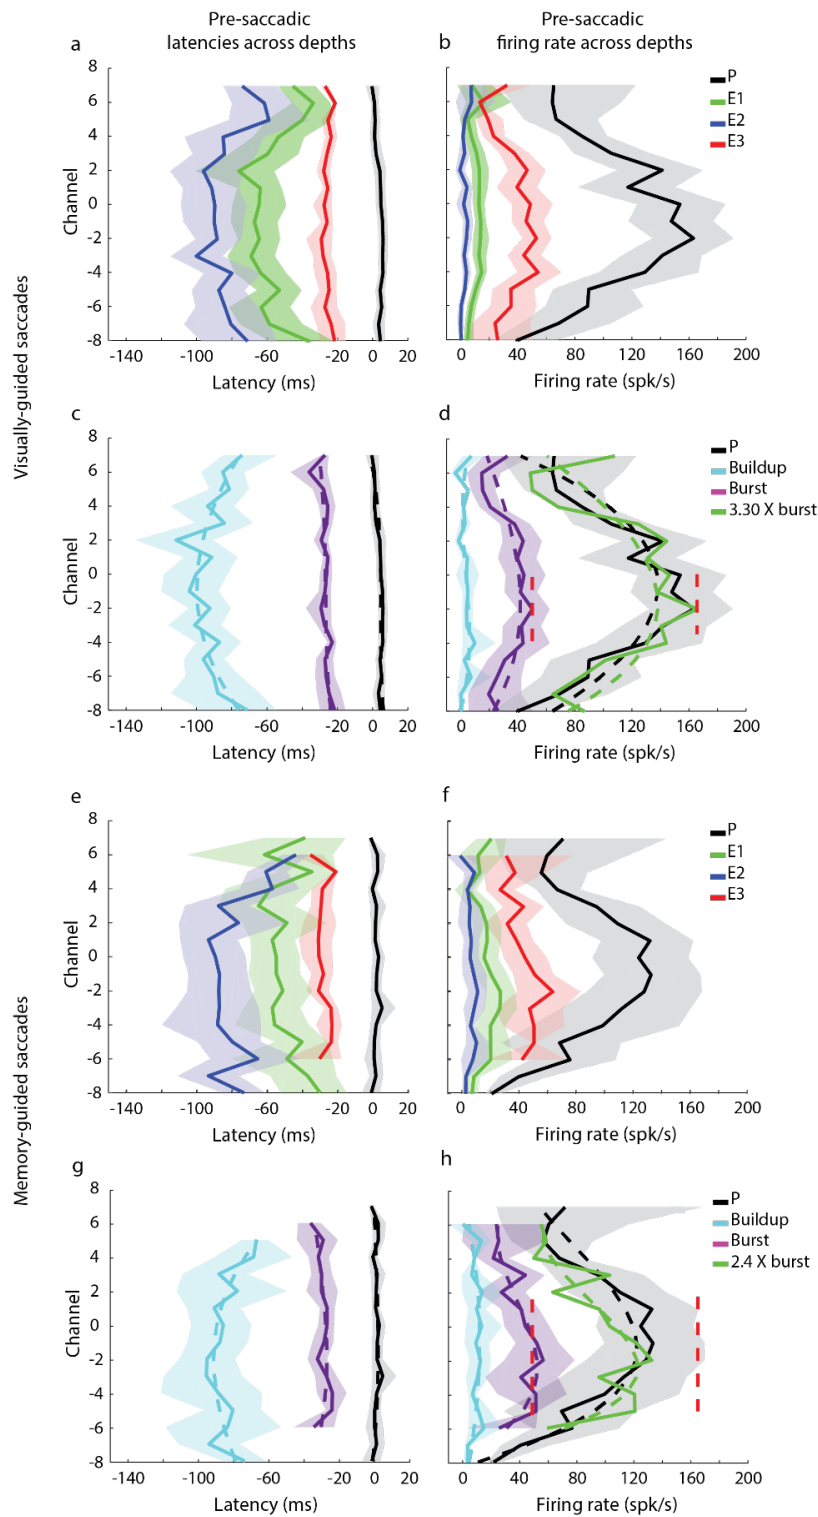

1105

1106

1107

1108

1109 **Figure 9**

1110

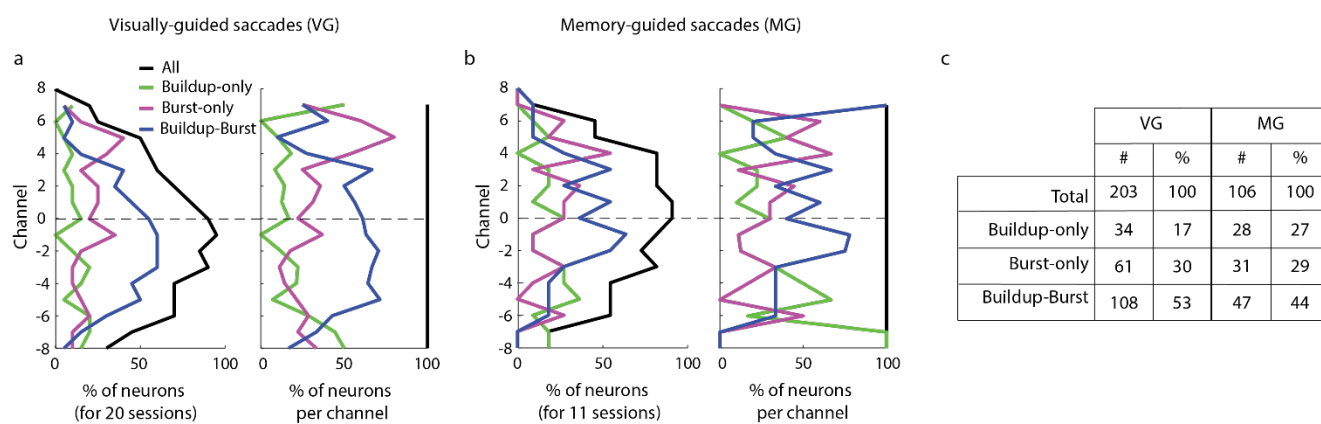

1111

1112

1113 **Figure 10**

1114

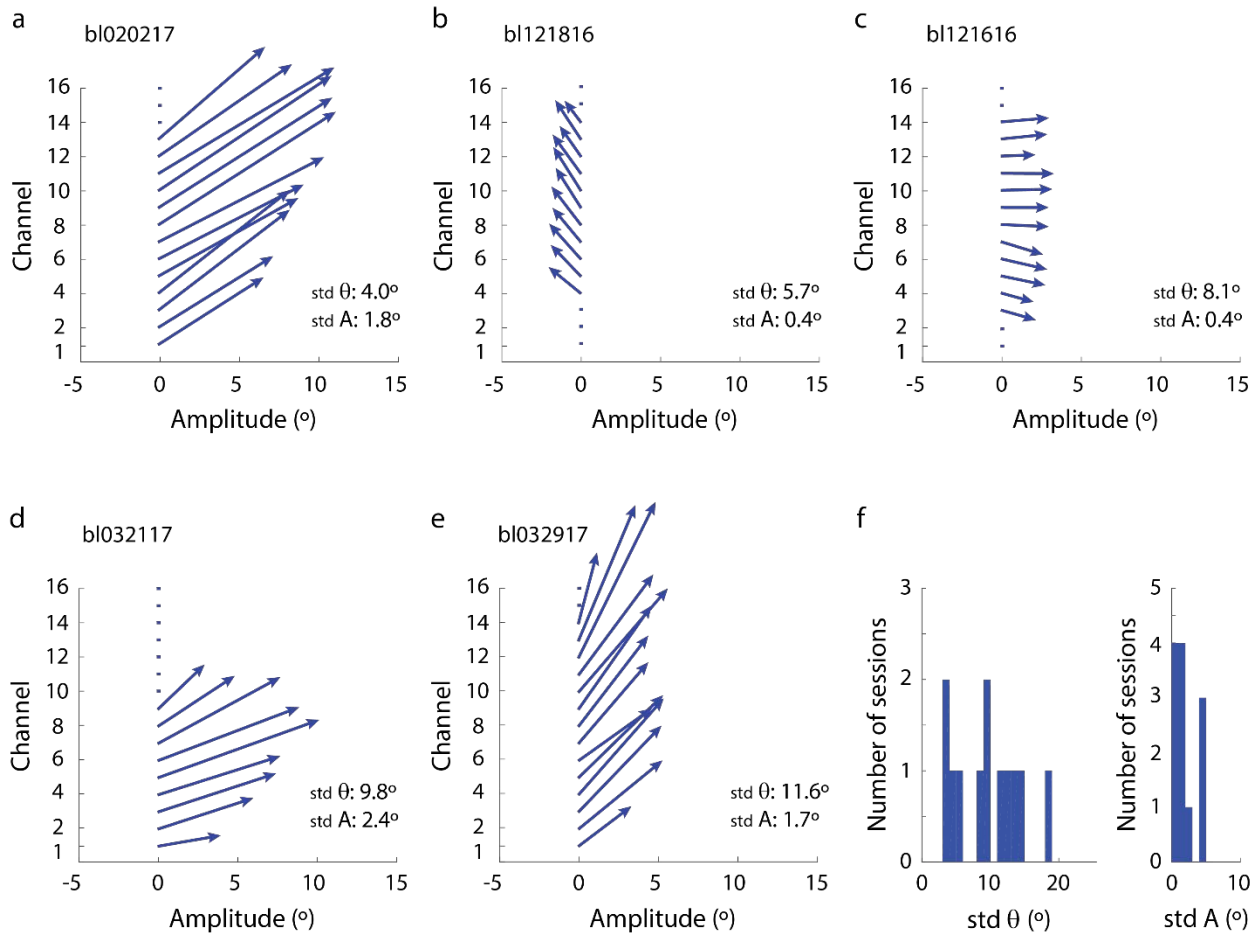

1115

1116

1117

1118 **Figure 11**

1119

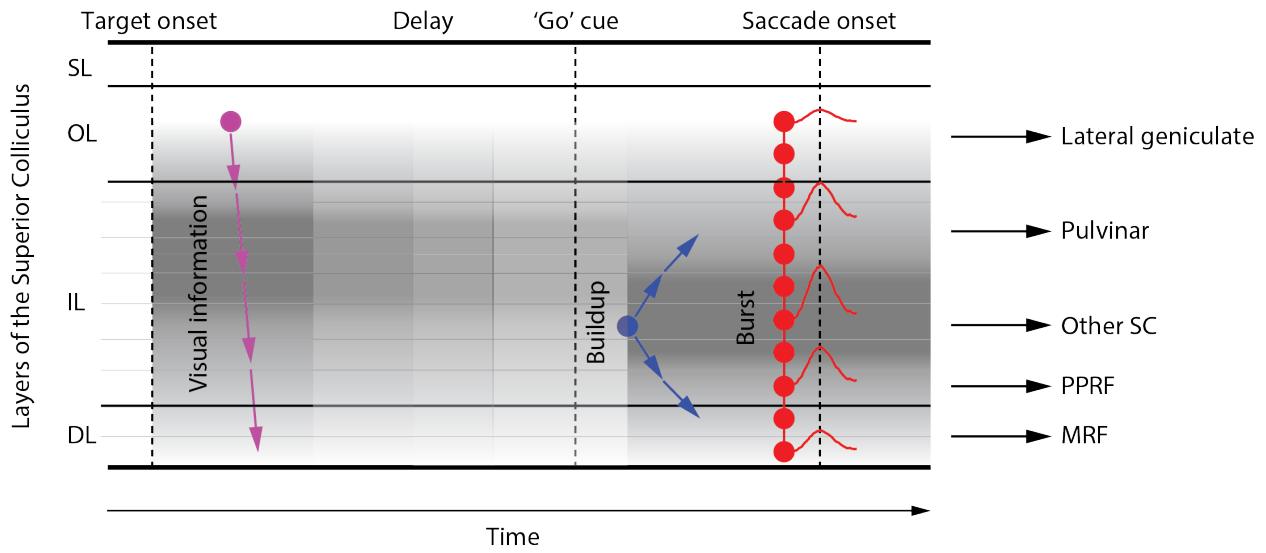

1120

1121

1122

1123 **References**

- 1124 1 May, P. J. The mammalian superior colliculus: laminar structure and connections. *Prog Brain Res*  
1125 **151**, 321-378 (2006).
- 1126 2 Basso, M. A. & May, P. J. Circuits for Action and Cognition: A View from the Superior Colliculus.  
1127 *Annu Rev Vis Sci* **3**, 197-226 (2017).
- 1128 3 Krauzlis, R. J., Lovejoy, L. P. & Zenon, A. Superior colliculus and visual spatial attention. *Annu Rev*  
1129 *Neurosci* **36**, 165-182 (2013).
- 1130 4 Isa, T. & Hall, W. C. Exploring the superior colliculus in vitro. *J Neurophysiol* **102**, 2581-2593  
1131 (2009).
- 1132 5 Gandhi, N. J. & Katnani, H. A. Motor functions of the superior colliculus. *Annu Rev Neurosci* **34**,  
1133 203-229 (2011).
- 1134 6 Murakami, M. & Mainen, Z. F. Preparing and selecting actions with neural populations: toward  
1135 cortical circuit mechanisms. *Curr Opin Neurobiol* **33**, 40-46 (2015).
- 1136 7 Song, H. F., Yang, G. R. & Wang, X. J. Training Excitatory-Inhibitory Recurrent Neural Networks  
1137 for Cognitive Tasks: A Simple and Flexible Framework. *PLoS Comput Biol* **12** (2016).
- 1138 8 Maier, A., Aura, C. J. & Leopold, D. A. Infragranular sources of sustained local field potential  
1139 responses in macaque primary visual cortex. *J Neurosci* **31**, 1971-1980 (2011).
- 1140 9 Self, M. W., van Kerkoerle, T., Super, H. & Roelfsema, P. R. Distinct roles of the cortical layers of  
1141 area V1 in figure-ground segregation. *Curr Biol* **23**, 2121-2129 (2013).
- 1142 10 Kajikawa, Y., Smiley, J. F. & Schroeder, C. E. Primary Generators of Visually Evoked Field  
1143 Potentials Recorded in the Macaque Auditory Cortex. *J Neurosci* **37**, 10139-10153 (2017).
- 1144 11 Wohlgenuth, M. J., Kothari, N. B. & Moss, C. F. Functional Organization and Dynamic Activity in  
1145 the Superior Colliculus of the Echolocating Bat, *Eptesicus fuscus*. *J Neurosci* **38**, 245-256 (2018).
- 1146 12 van Kerkoerle, T., Self, M. W. & Roelfsema, P. R. Layer-specificity in the effects of attention and  
1147 working memory on activity in primary visual cortex. *Nature communications* **8**, 13804 (2017).
- 1148 13 Nandy, A. S., Nassi, J. J. & Reynolds, J. H. Laminar Organization of Attentional Modulation in  
1149 Macaque Visual Area V4. *Neuron* **93**, 235-246 (2017).
- 1150 14 Bastos, A. M., Loonis, R., Kornblith, S., Lundqvist, M. & Miller, E. K. Laminar recordings in frontal  
1151 cortex suggest distinct layers for maintenance and control of working memory. *Proc Natl Acad*  
1152 *Sci U S A* **115**, 1117-1122 (2018).
- 1153 15 Chandrasekaran, C., Peixoto, D., Newsome, W. T. & Shenoy, K. V. Laminar differences in  
1154 decision-related neural activity in dorsal premotor cortex. *Nature communications* **8**, 614 (2017).
- 1155 16 Maass, A. *et al.* Laminar activity in the hippocampus and entorhinal cortex related to novelty  
1156 and episodic encoding. *Nature communications* **5**, 5547 (2014).
- 1157 17 Ninomiya, T., Dougherty, K., Godlove, D. C., Schall, J. D. & Maier, A. Microcircuitry of agranular  
1158 frontal cortex: contrasting laminar connectivity between occipital and frontal areas. *J*  
1159 *Neurophysiol* **113**, 3242-3255 (2015).
- 1160 18 Godlove, D. C., Maier, A., Woodman, G. F. & Schall, J. D. Microcircuitry of agranular frontal  
1161 cortex: testing the generality of the canonical cortical microcircuit. *J Neurosci* **34**, 5355-5369  
1162 (2014).
- 1163 19 Marino, R. A. *et al.* Linking visual response properties in the superior colliculus to saccade  
1164 behavior. *Eur J Neurosci* **35**, 1738-1752 (2012).
- 1165 20 Mays, L. E. & Sparks, D. L. Dissociation of visual and saccade-related responses in superior  
1166 colliculus neurons. *J Neurophysiol* **43**, 207-232 (1980).
- 1167 21 McPeck, R. M. & Keller, E. L. Saccade target selection in the superior colliculus during a visual  
1168 search task. *J Neurophysiol* **88**, 2019-2034 (2002).

- 1169 22 Edelman, J. A. & Goldberg, M. E. Dependence of saccade-related activity in the primate superior  
1170 colliculus on visual target presence. *J Neurophysiol* **86**, 676-691. (2001).
- 1171 23 Hafed, Z. M. & Chen, C. Y. Sharper, Stronger, Faster Upper Visual Field Representation in Primate  
1172 Superior Colliculus. *Curr Biol* **26**, 1647-1658 (2016).
- 1173 24 Hanes, D. P., Thompson, K. G. & Schall, J. D. Relationship of presaccadic activity in frontal eye  
1174 field and supplementary eye field to saccade initiation in macaque: Poisson spike train analysis.  
1175 *Exp Brain Res* **103**, 85-96 (1995).
- 1176 25 Plomp, G., Michel, C. M. & Quairiaux, C. Systematic population spike delays across cortical layers  
1177 within and between primary sensory areas. *Sci Rep* **7**, 15267 (2017).
- 1178 26 Munoz, D. P. & Wurtz, R. H. Saccade-related activity in monkey superior colliculus. I.  
1179 Characteristics of burst and buildup cells. *J Neurophysiol* **73**, 2313-2333 (1995).
- 1180 27 Glimcher, P. W. & Sparks, D. L. Movement selection in advance of action in the superior  
1181 colliculus. *Nature* **355**, 542-545 (1992).
- 1182 28 Wurtz, R. H. & Mohler, C. W. Enhancement of visual responses in monkey striate cortex and  
1183 frontal eye fields. *J Neurophysiol* **39**, 766-772 (1976).
- 1184 29 Isa, T., Endo, T. & Saito, Y. The visuo-motor pathway in the local circuit of the rat superior  
1185 colliculus. *J Neurosci* **18**, 8496-8504 (1998).
- 1186 30 Jagadisan, U. K. & Gandhi, N. J. Disruption of Fixation Reveals Latent Sensorimotor Processes in  
1187 the Superior Colliculus. *J Neurosci* **36**, 6129-6140 (2016).
- 1188 31 Schiller, P. H., Stryker, M., Cynader, M. & Berman, N. Response characteristics of single cells in  
1189 the monkey superior colliculus following ablation or cooling of visual cortex. *J Neurophysiol* **37**,  
1190 181-194 (1974).
- 1191 32 Takaura, K., Yoshida, M. & Isa, T. Neural substrate of spatial memory in the superior colliculus  
1192 after damage to the primary visual cortex. *J Neurosci* **31**, 4233-4241 (2011).
- 1193 33 Helminski, J. O. & Segraves, M. A. Macaque frontal eye field input to saccade-related neurons in  
1194 the superior colliculus. *J Neurophysiol* **90**, 1046-1062 (2003).
- 1195 34 Sommer, M. A. & Wurtz, R. H. Frontal eye field sends delay activity related to movement,  
1196 memory, and vision to the superior colliculus. *J Neurophysiol* **85**, 1673-1685 (2001).
- 1197 35 Phongphanphane, P. *et al.* Distinct local circuit properties of the superficial and intermediate  
1198 layers of the rodent superior colliculus. *Eur J Neurosci* **40**, 2329-2343 (2014).
- 1199 36 Lim, S. & Goldman, M. S. Balanced cortical microcircuitry for maintaining information in working  
1200 memory. *Nat Neurosci* **16**, 1306-1314 (2013).
- 1201 37 Ghitani, N., Bayguinov, P. O., Basso, M. A. & Jackson, M. B. A sodium afterdepolarization in rat  
1202 superior colliculus neurons and its contribution to population activity. *J Neurophysiol* **116**, 191-  
1203 200 (2016).
- 1204 38 Saito, Y. & Isa, T. Electrophysiological and morphological properties of neurons in the rat  
1205 superior colliculus. I. Neurons in the intermediate layer. *J Neurophysiol* **82**, 754-767 (1999).
- 1206 39 Ikeda, T. *et al.* Spatio-temporal response properties of local field potentials in the primate  
1207 superior colliculus. *Eur J Neurosci* **41**, 856-865 (2015).
- 1208 40 Lee, J. & Groh, J. M. Auditory signals evolve from hybrid- to eye-centered coordinates in the  
1209 primate superior colliculus. *J Neurophysiol* **108**, 227-242 (2012).
- 1210 41 Caruso, V. C., Pages, D. S., Sommer, M. A. & Groh, J. M. Beyond the labeled line: variation in  
1211 visual reference frames from intraparietal cortex to frontal eye fields and the superior colliculus.  
1212 *J Neurophysiol* **119**, 1411-1421 (2018).
- 1213 42 Sadeh, M., Sajad, A., Wang, H., Yan, X. & Crawford, J. D. Spatial transformations between  
1214 superior colliculus visual and motor response fields during head-unrestrained gaze shifts. *Eur J*  
1215 *Neurosci* **42**, 2934-2951 (2015).

- 1216 43 DeSouza, J. F. *et al.* Intrinsic reference frames of superior colliculus visuomotor receptive fields  
1217 during head-unrestrained gaze shifts. *J Neurosci* **31**, 18313-18326 (2011).
- 1218 44 Sadeh, M., Sajad, A., Wang, H., Yan, X. & Crawford, J. D. The Influence of a Memory Delay on  
1219 Spatial Coding in the Superior Colliculus: Is Visual Always Visual and Motor Always Motor? *Front*  
1220 *Neural Circuits* **12**, 74 (2018).
- 1221 45 Kaufman, M. T., Churchland, M. M., Ryu, S. I. & Shenoy, K. V. Cortical activity in the null space:  
1222 permitting preparation without movement. *Nature neuroscience* **17**, 440-448 (2014).
- 1223 46 Churchland, M. M., Yu, B. M., Ryu, S. I., Santhanam, G. & Shenoy, K. V. Neural variability in  
1224 premotor cortex provides a signature of motor preparation. *J Neurosci* **26**, 3697-3712 (2006).
- 1225 47 Jagadisan, U. K. & Gandhi, N. J. Population Temporal Structure Supplements The Rate Code  
1226 During Sensorimotor Transformations. *bioRxiv*, 132514 (2018).
- 1227 48 Pettit, D. L., Helms, M. C., Lee, P., Augustine, G. J. & Hall, W. C. Local excitatory circuits in the  
1228 intermediate gray layer of the superior colliculus. *J Neurophysiol* **81**, 1424-1427 (1999).
- 1229 49 Saito, Y. & Isa, T. Local excitatory network and NMDA receptor activation generate a  
1230 synchronous and bursting command from the superior colliculus. *J Neurosci* **23**, 5854-5864  
1231 (2003).
- 1232 50 Özen, G., Augustine, G. J. & Hall, W. C. Contribution of superficial layer neurons to premotor  
1233 bursts in the superior colliculus. *J Neurophysiol* **84**, 460-471 (2000).
- 1234 51 Phongphanphane, P., Kaneda, K. & Isa, T. Spatiotemporal profiles of field potentials in mouse  
1235 superior colliculus analyzed by multichannel recording. *J Neurosci* **28**, 9309-9318 (2008).
- 1236 52 Ghitani, N. *et al.* Excitatory synaptic feedback from the motor layer to the sensory layers of the  
1237 superior colliculus. *J Neurosci* **34**, 6822-6833 (2014).
- 1238 53 Vokoun, C. R., Jackson, M. B. & Basso, M. A. Intralaminar and interlaminar activity within the  
1239 rodent superior colliculus visualized with voltage imaging. *J Neurosci* **30**, 10667-10682 (2010).
- 1240 54 Rodgers, C. K., Munoz, D. P., Scott, S. H. & Pare, M. Discharge properties of monkey  
1241 tectoreticular neurons. *J Neurophysiol* **95**, 3502-3511 (2006).
- 1242 55 Raybourn, M. S. & Keller, E. L. Colliculoreticular organization in primate oculomotor system. *J*  
1243 *Neurophysiol* **40**, 861-878 (1977).
- 1244 56 Smalianchuk, I., Jagadisan, U. K. & Gandhi, N. J. Instantaneous Midbrain Control of Saccade  
1245 Velocity. *J Neurosci* **38**, 10156-10167 (2018).
- 1246 57 Jagadisan, U. K. & Gandhi, N. J. Removal of inhibition uncovers latent movement potential  
1247 during preparation. *Elife* **6** (2017).
- 1248 58 Sparks, D. L. Functional properties of neurons in the monkey superior colliculus: coupling of  
1249 neuronal activity and saccade onset. *Brain Res* **156**, 1-16 (1978).
- 1250 59 Mohler, C. W. & Wurtz, R. H. Organization of monkey superior colliculus: intermediate layer cells  
1251 discharging before eye movements. *J Neurophysiol* **39**, 722-744 (1976).
- 1252 60 Wurtz, R. H. & Albano, J. E. Visual-motor function of the primate superior colliculus. *Annu Rev*  
1253 *Neurosci* **3**, 189-226 (1980).
- 1254 61 Waitzman, D. M., Ma, T. P., Optican, L. M. & Wurtz, R. H. Superior colliculus neurons mediate  
1255 the dynamic characteristics of saccades. *J Neurophysiol* **66**, 1716-1737 (1991).
- 1256 62 Munoz, D. P. & Wurtz, R. H. Fixation cells in monkey superior colliculus. I. Characteristics of cell  
1257 discharge. *J Neurophysiol* **70**, 559-575 (1993).
- 1258 63 Hafed, Z. M., Goffart, L. & Krauzlis, R. J. A neural mechanism for microsaccade generation in the  
1259 primate superior colliculus. *Science* **323**, 940-943 (2009).
- 1260 64 Reppert, T. R., Servant, M., Heitz, R. P. & Schall, J. D. Neural mechanisms of speed-accuracy  
1261 tradeoff of visual search: saccade vigor, the origin of targeting errors, and comparison of the  
1262 superior colliculus and frontal eye field. *J Neurophysiol* **120**, 372-384 (2018).

- 1263 65 Peel, T. R., Dash, S., Lomber, S. G. & Corneil, B. D. Frontal Eye Field Inactivation Diminishes  
1264 Superior Colliculus Activity, But Delayed Saccadic Accumulation Governs Reaction Time  
1265 Increases. *J Neurosci* **37**, 11715-11730 (2017).
- 1266 66 Ratcliff, R., Cherian, A. & Segraves, M. A comparison of macaque behavior and superior  
1267 colliculus neuronal activity to predictions from models of two-choice decisions. *J Neurophysiol*  
1268 **90**, 1392-1407 (2003).
- 1269 67 Hanes, D. P. & Schall, J. D. Countermanding saccades in macaque. *Vis Neurosci* **12**, 929-937  
1270 (1995).
- 1271 68 Jantz, J. J., Watanabe, M., Everling, S. & Munoz, D. P. Threshold mechanism for saccade initiation  
1272 in the frontal eye field and superior colliculus. *J Neurophysiol* **109**, 2767-2780 (2013).
- 1273 69 Cullen, K. E. & Guitton, D. Analysis of primate IBN spike trains using system identification  
1274 techniques. I. Relationship To eye movement dynamics during head-fixed saccades. *J*  
1275 *Neurophysiol* **78**, 3259-3282 (1997).
- 1276 70 Gandhi, N. J. & Keller, E. L. Activity of the brain stem omnipause neurons during saccades  
1277 perturbed by stimulation of the primate superior colliculus. *J Neurophysiol* **82**, 3254-3267  
1278 (1999).
- 1279 71 Keller, E. L. Participation of medial pontine reticular formation in eye movement generation in  
1280 monkey. *J Neurophysiol* **37**, 316-332 (1974).
- 1281 72 Zandbelt, B., Purcell, B. A., Palmeri, T. J., Logan, G. D. & Schall, J. D. Response times from  
1282 ensembles of accumulators. *Proc Natl Acad Sci U S A* **111**, 2848-2853 (2014).
- 1283 73 Katnani, H. A. & Gandhi, N. J. Order of operations for decoding superior colliculus activity for  
1284 saccade generation. *J Neurophysiol* **106**, 1250-1259 (2011).
- 1285 74 Drucker, C. B., Carlson, M. L., Toda, K., DeWind, N. K. & Platt, M. L. Non-invasive primate head  
1286 restraint using thermoplastic masks. *J Neurosci Methods* **253**, 90-100 (2015).
- 1287 75 Bryant, C. L. & Gandhi, N. J. Real-time data acquisition and control system for the measurement  
1288 of motor and neural data. *J Neurosci Methods* **142**, 193-200 (2005).
- 1289 76 Thompson, K. G., Hanes, D. P., Bichot, N. P. & Schall, J. D. Perceptual and motor processing  
1290 stages identified in the activity of macaque frontal eye field neurons during visual search. *J*  
1291 *Neurophysiol* **76**, 4040-4055 (1996).
- 1292 77 Nicholson, C. & Freeman, J. A. Theory of current source-density analysis and determination of  
1293 conductivity tensor for anuran cerebellum. *J Neurophysiol* **38**, 356-368 (1975).
- 1294 78 Pettersen, K. H., Devor, A., Ulbert, I., Dale, A. M. & Einevoll, G. T. Current-source density  
1295 estimation based on inversion of electrostatic forward solution: effects of finite extent of  
1296 neuronal activity and conductivity discontinuities. *J Neurosci Methods* **154**, 116-133 (2006).
- 1297 79 Ma, T. P., Graybiel, A. M. & Wurtz, R. H. Location of saccade-related neurons in the macaque  
1298 superior colliculus. *Exp Brain Res* **85**, 21-35 (1991).
- 1299
